# Supplementary material for: Discovery of Peptidic Siderophore Degradation by Screening Natural Product Profiles in Marine-Derived Bacterial Mono- and Cocultures
Source: PubMed Central journal article supplement (PMC11800396; doi:10.1021/acs.biochem.4c00706), 2025-01-14
Supplement: bi4c00706_si_001.pdf [file bi4c00706_si_001.pdf]

## Supporting information

### Discovery of peptidic siderophore degradation by screening natural product profiles in marine-derived bacterial mono- and cocultures.

Mónica Monge-Loría<sup>1</sup>, Weimao Zhong<sup>1</sup>, Nadine H. Abrahamse<sup>1</sup>, Stephen Hartter<sup>2</sup>,  
Neha Garg\*<sup>1,3</sup>

<sup>1</sup>School of Chemistry and Biochemistry, Georgia Institute of Technology. 950 Atlantic Drive, Atlanta, GA 30332 (USA).

<sup>2</sup>Georgia Aquarium. 225 Baker St. NW, Atlanta, GA 30313 (USA).

<sup>3</sup>Center for Microbial Dynamics and Infection, Georgia Institute of Technology. 315 Ferst Drive, Atlanta, GA 30332 (USA).

Correspondence: [neha.garg@chemistry.gatech.edu](mailto:neha.garg@chemistry.gatech.edu)

## Table of Contents

|                                                                                                                                                                                                                     |    |
|---------------------------------------------------------------------------------------------------------------------------------------------------------------------------------------------------------------------|----|
| <b>Figure S1.</b> Representative feature-based molecular networking for mono- and coculture experiments. ....                                                                                                       | 3  |
| <b>Figure S2.</b> Heatmap of the top 50 features in monocultures and coculture of <i>V. coralliilyticus</i> Cn52-H1 and <i>Microbulbifer</i> sp. CNSA002 .....                                                      | 4  |
| <b>Figure S3.</b> Natural product extraction and characterization workflow.....                                                                                                                                     | 5  |
| <b>Figure S4.</b> Amphibactin F degradation product, elucidated through 1D and 2D NMR experiments. ....                                                                                                             | 5  |
| <b>Figure S5.</b> The <sup>1</sup> H NMR spectrum of compound <b>1</b> (700 MHz, DMSO- <i>d</i> <sub>6</sub> ) .....                                                                                                | 6  |
| <b>Figure S6.</b> The <sup>13</sup> C NMR spectrum of compound <b>1</b> (176 MHz, DMSO- <i>d</i> <sub>6</sub> ) .....                                                                                               | 7  |
| <b>Figure S7.</b> The DEPT135 NMR spectrum of compound <b>1</b> (176 MHz, DMSO- <i>d</i> <sub>6</sub> ).....                                                                                                        | 8  |
| <b>Figure S8.</b> The HSQC spectrum of compound <b>1</b> (700 MHz, DMSO- <i>d</i> <sub>6</sub> ) .....                                                                                                              | 9  |
| <b>Figure S9.</b> The HMBC spectrum of compound <b>1</b> (700 MHz, DMSO- <i>d</i> <sub>6</sub> ).....                                                                                                               | 10 |
| <b>Figure S10.</b> The <sup>1</sup> H- <sup>1</sup> H COSY NMR spectrum of compound <b>1</b> (700 MHz, DMSO- <i>d</i> <sub>6</sub> ) .....                                                                          | 11 |
| <b>Figure S11.</b> The <sup>1</sup> H- <sup>1</sup> H TOCSY spectrum of compound <b>1</b> (700 MHz, DMSO- <i>d</i> <sub>6</sub> ) .....                                                                             | 12 |
| <b>Figure S12.</b> The ROESY spectrum of compound <b>1</b> (700 MHz, DMSO- <i>d</i> <sub>6</sub> ).....                                                                                                             | 13 |
| <b>Figure S13.</b> MS <sup>2</sup> spectral analysis of amphibactins and degradation products. ....                                                                                                                 | 16 |
| <b>Figure S14.</b> MS <sup>2</sup> spectral analysis of new amphibactin analogs, compared to amphibactin B. .                                                                                                       | 17 |
| <b>Figure S15.</b> <i>Microbulbifer</i> sp. CNSA002 O-CAS agar assay.....                                                                                                                                           | 18 |
| <b>Figure S16.</b> Detection of degraded amphibactins in <i>V. coralliilyticus</i> Cn52-H1 in coculture with <i>Microbulbifer</i> sp. CNSA002 and supplemented with <i>Microbulbifer</i> sp. CNSA002 supernatant... | 19 |
| <b>Figure S17.</b> Detection of degraded amphibactins in <i>V. coralliilyticus</i> Cn52-H1 supernatant, supplemented with different <i>Microbulbifer</i> sp. CNSA002 fractions.....                                 | 20 |

|                                                                                                                                                                                                                                                                        |    |
|------------------------------------------------------------------------------------------------------------------------------------------------------------------------------------------------------------------------------------------------------------------------|----|
| <b>Figure S18.</b> Boxplot of the relative abundances of desferrioxamine G and ferrioxamine G (619.366 <i>m/z</i> and 672.277 <i>m/z</i> respectively) in <i>Pseudoalteromonas</i> sp. Cnat2-18.1 and <i>Microbulbifer</i> sp. CNSA002 monocultures and coculture..... | 21 |
| <b>Figure S19.</b> Mirror plots comparing experimental MS <sup>2</sup> spectra of natural products detected in this study with spectra deposited in the GNPS library. ....                                                                                             | 22 |
| <b>Figure S20.</b> Mirror plots comparing experimental MS <sup>2</sup> spectra of hydroxamate siderophores and HPTzTn-COOH detected in this study with spectra deposited in the GNPS library. ....                                                                     | 23 |
| <b>Figure S21.</b> Mirror plots comparing experimental MS <sup>2</sup> spectra of <i>N</i> -acyl amides detected in this study with spectra deposited in the GNPS library.....                                                                                         | 24 |
| <b>Figure S22.</b> Upset plot for <i>N</i> -acyl amides detected in different monocultures and cocultures. The top 8 intersections are shown for clarity. ....                                                                                                         | 25 |
| <br>                                                                                                                                                                                                                                                                   |    |
| <b>Table S1.</b> Putative annotation of top 50 features present in the <i>V. coralliilyticus</i> Cn52-H1 and <i>Microbulbifer</i> spp. CNSA002 coculture heatmap. ....                                                                                                 | 26 |
| <b>Table S2.</b> Putative annotation of 76 features uniquely detected in marine bacteria cocultures with <i>V. coralliilyticus</i> Cn52-H1. ....                                                                                                                       | 28 |
| <b>Table S3.</b> List of annotated metabolites detected in this study.....                                                                                                                                                                                             | 33 |
| <b>Table S4.</b> <sup>1</sup> H (700 MHz) and <sup>13</sup> C (176 MHz) NMR data of compound <b>1</b> in DMSO- <i>d</i> <sub>6</sub> ( <i>J</i> in Hz, $\delta$ in ppm).....                                                                                           | 35 |
| <b>Table S5.</b> Biosynthetic gene clusters present in <i>Microbulbifer</i> sp. bacteria analyzed in this study. ....                                                                                                                                                  | 36 |
| <b>Table S6.</b> List of annotated <i>N</i> -acyl amides detected in this study.....                                                                                                                                                                                   | 37 |

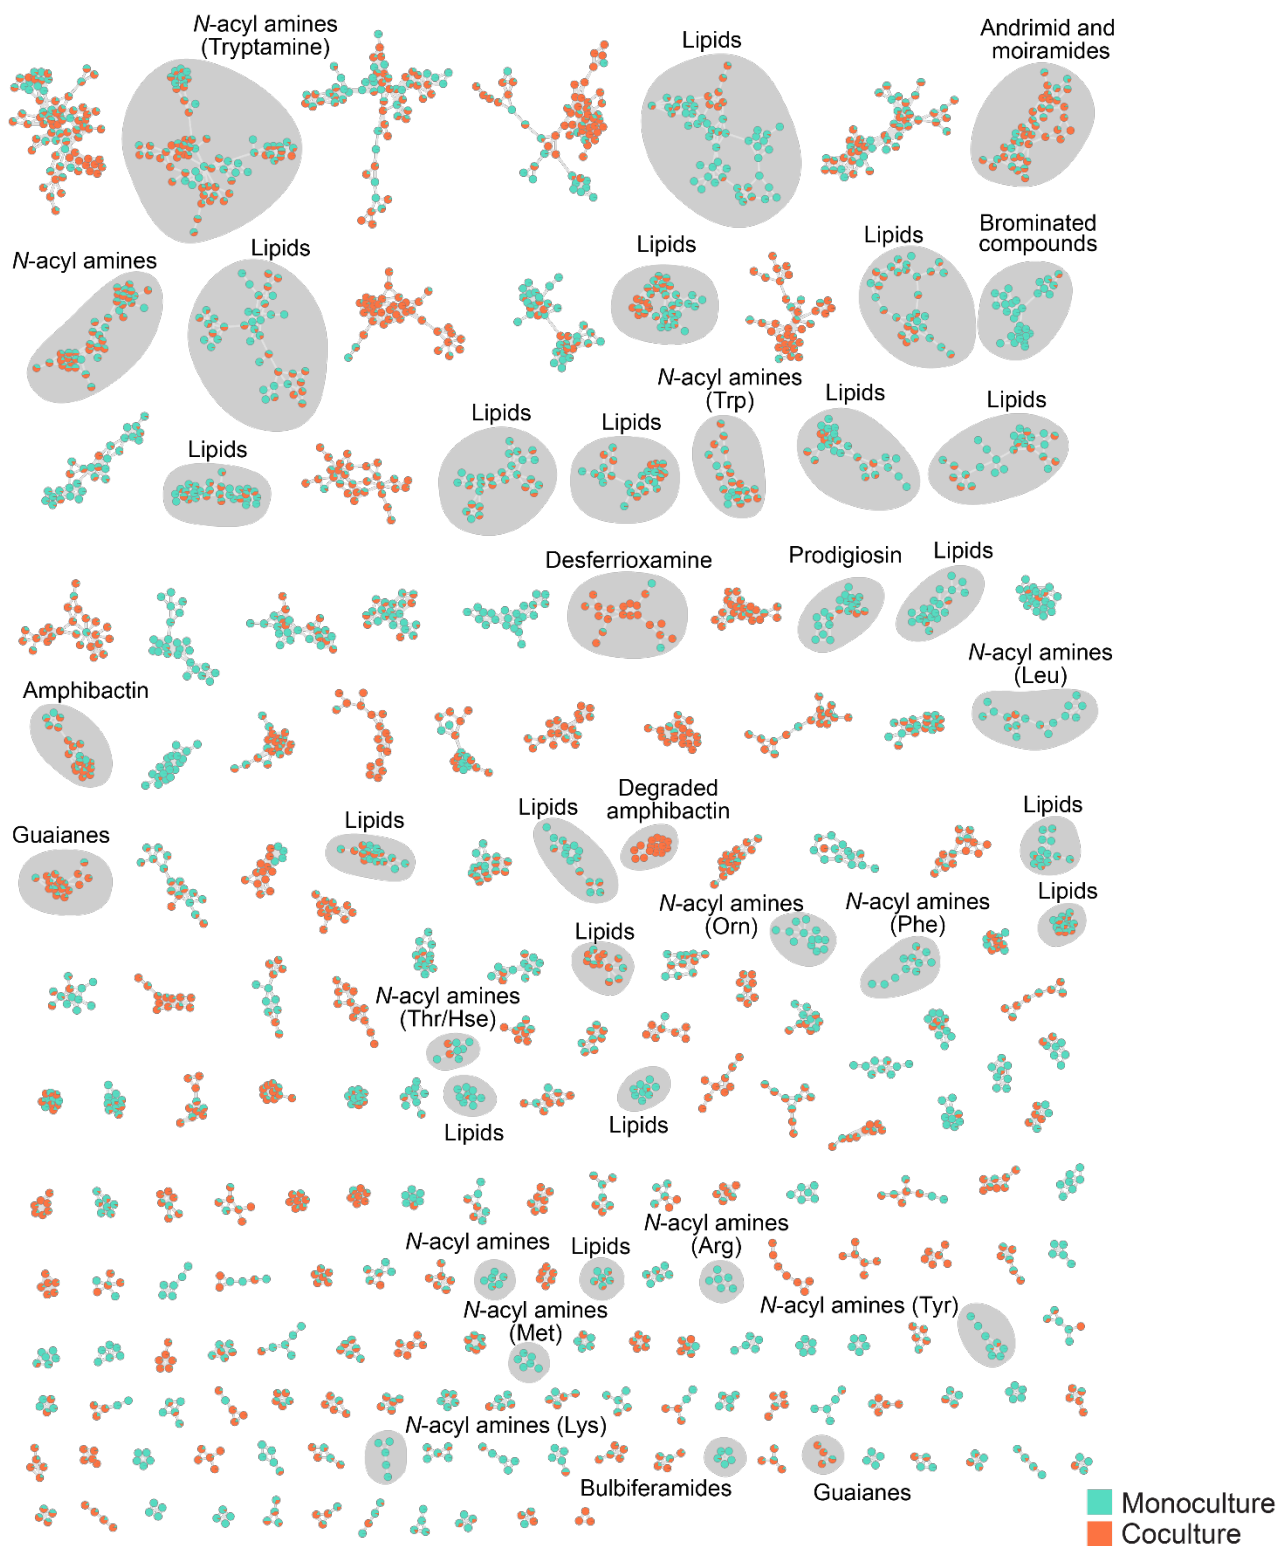

**Figure S1.** Representative feature-based molecular networking for mono- and coculture experiments. Annotated clusters and identified compound classes are shaded in gray. Singletons are removed for clarity.

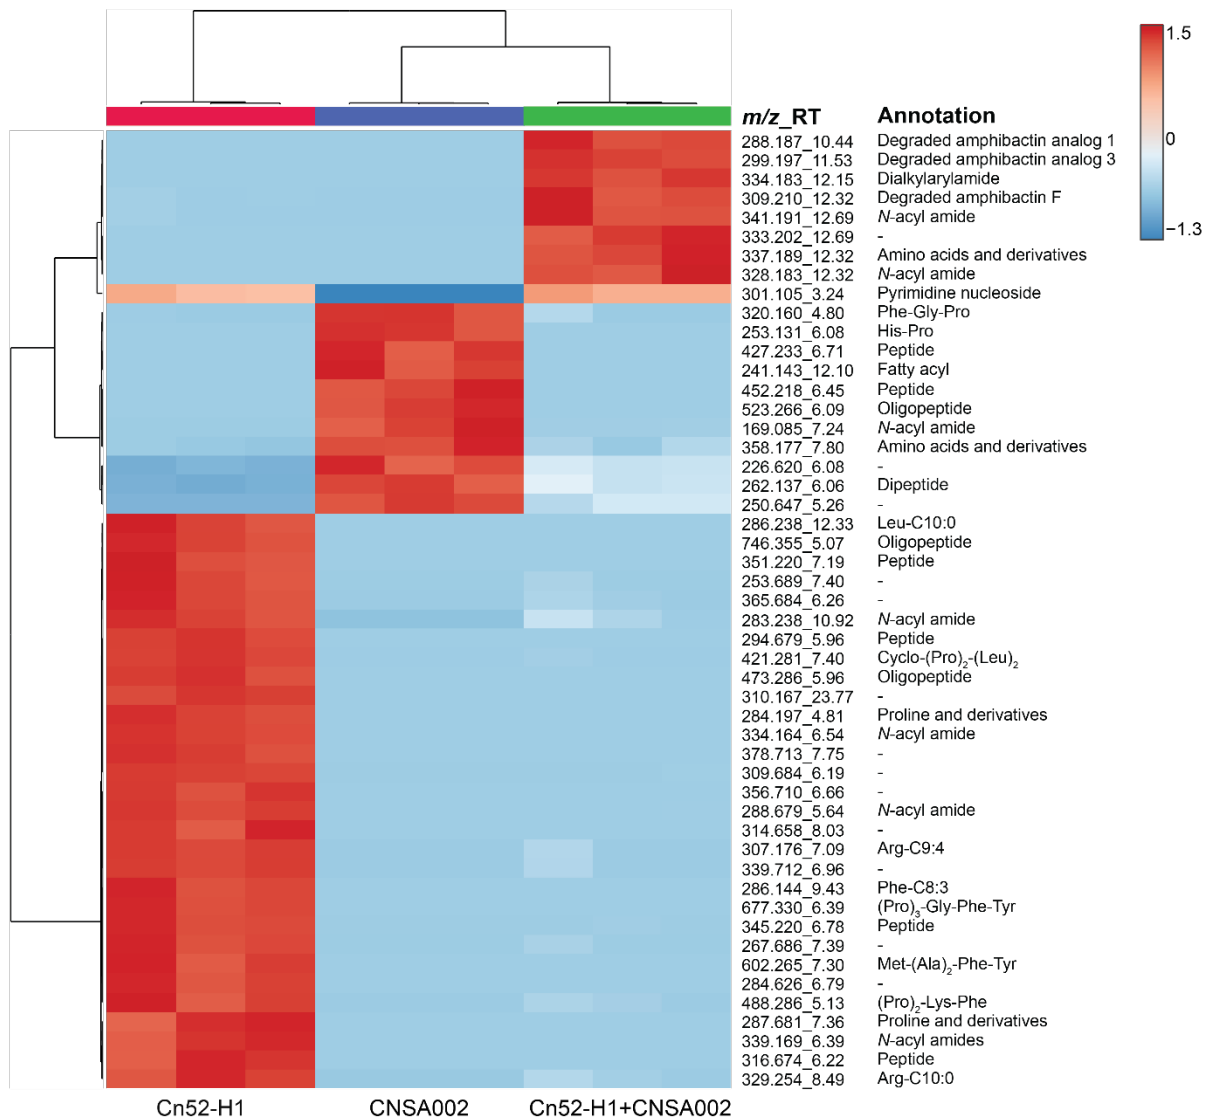

**Figure S2.** Heatmap of the top 50 features in monocultures and coculture of *V. coralliilyticus* Cn52-H1 and *Microbulbifer* sp. CNSA002 showing the differences in their relative abundances

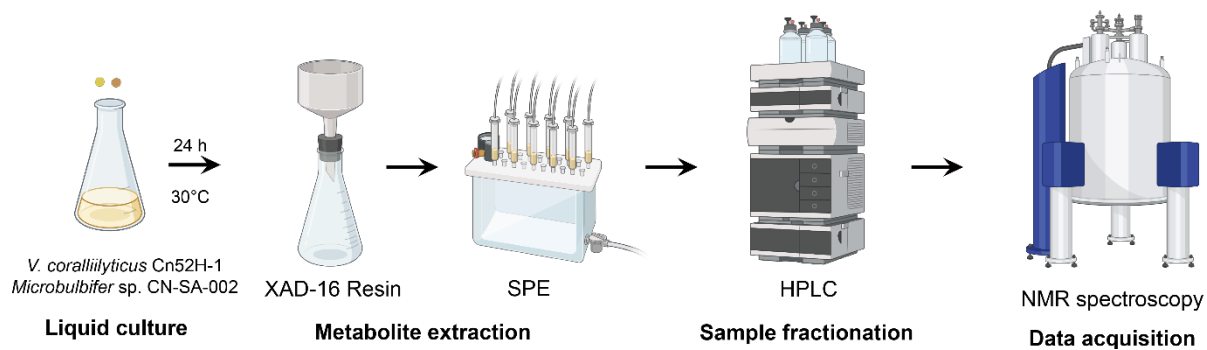

**Figure S3.** Natural product extraction and characterization workflow. In order to elucidate the structure of the compounds of interest, a large-scale *V. coralliilyticus* Cn52-H1 and *Microbulbifer* sp. CNSA002 coculture was extracted and fractionated. NMR data was acquired on fractions of interest for structure elucidation

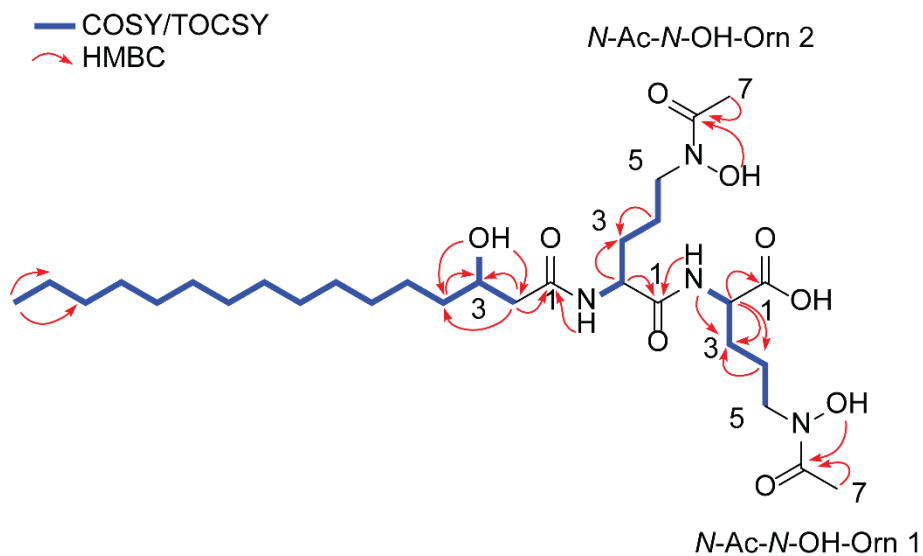

**Figure S4.** The structure of degraded Amphibactin F, elucidated through 1D and 2D NMR experiments.

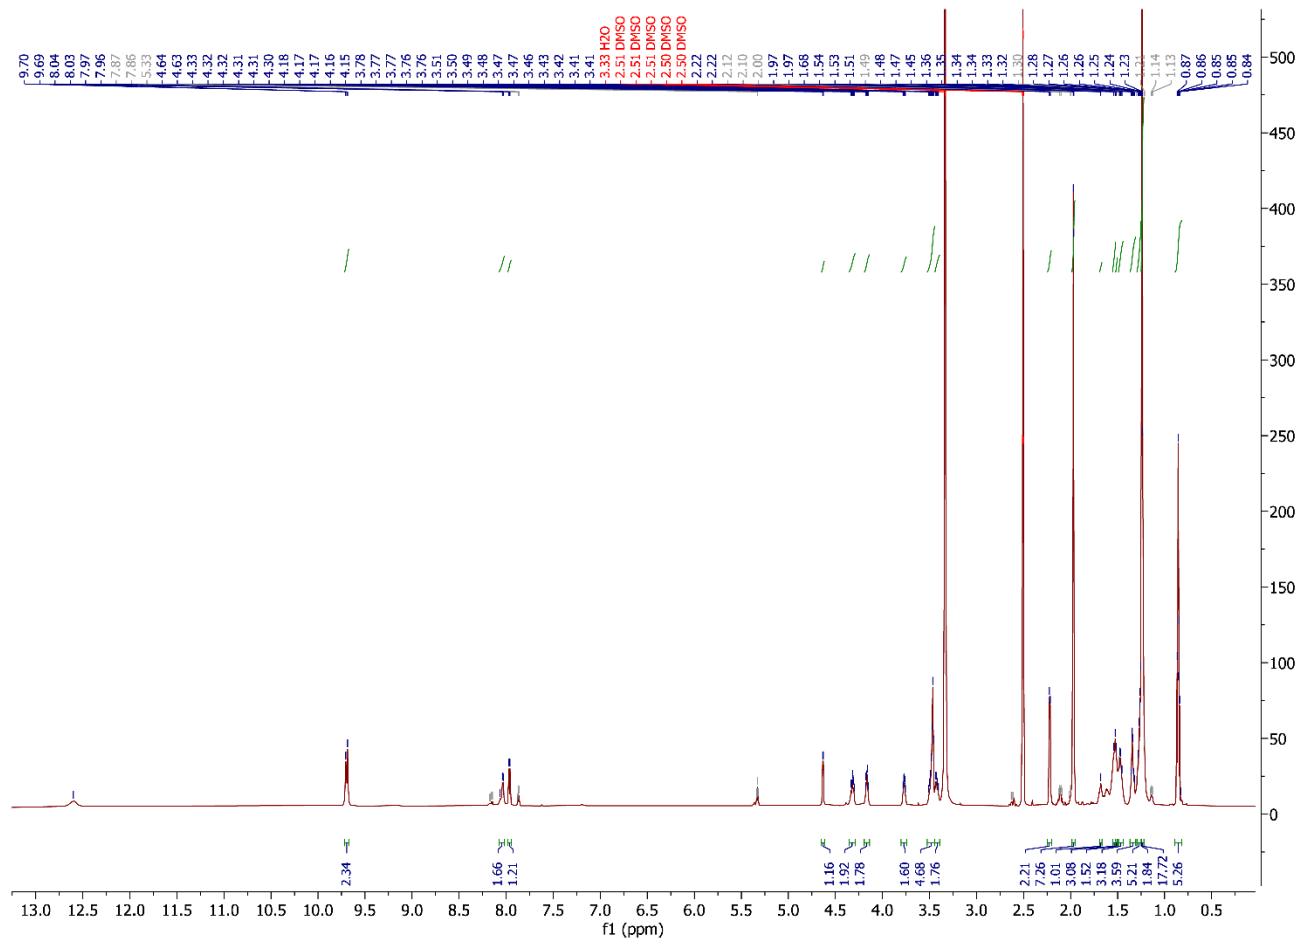

**Figure S5.** The <sup>1</sup>H NMR spectrum of compound **1** (700 MHz, DMSO-*d*<sub>6</sub>).

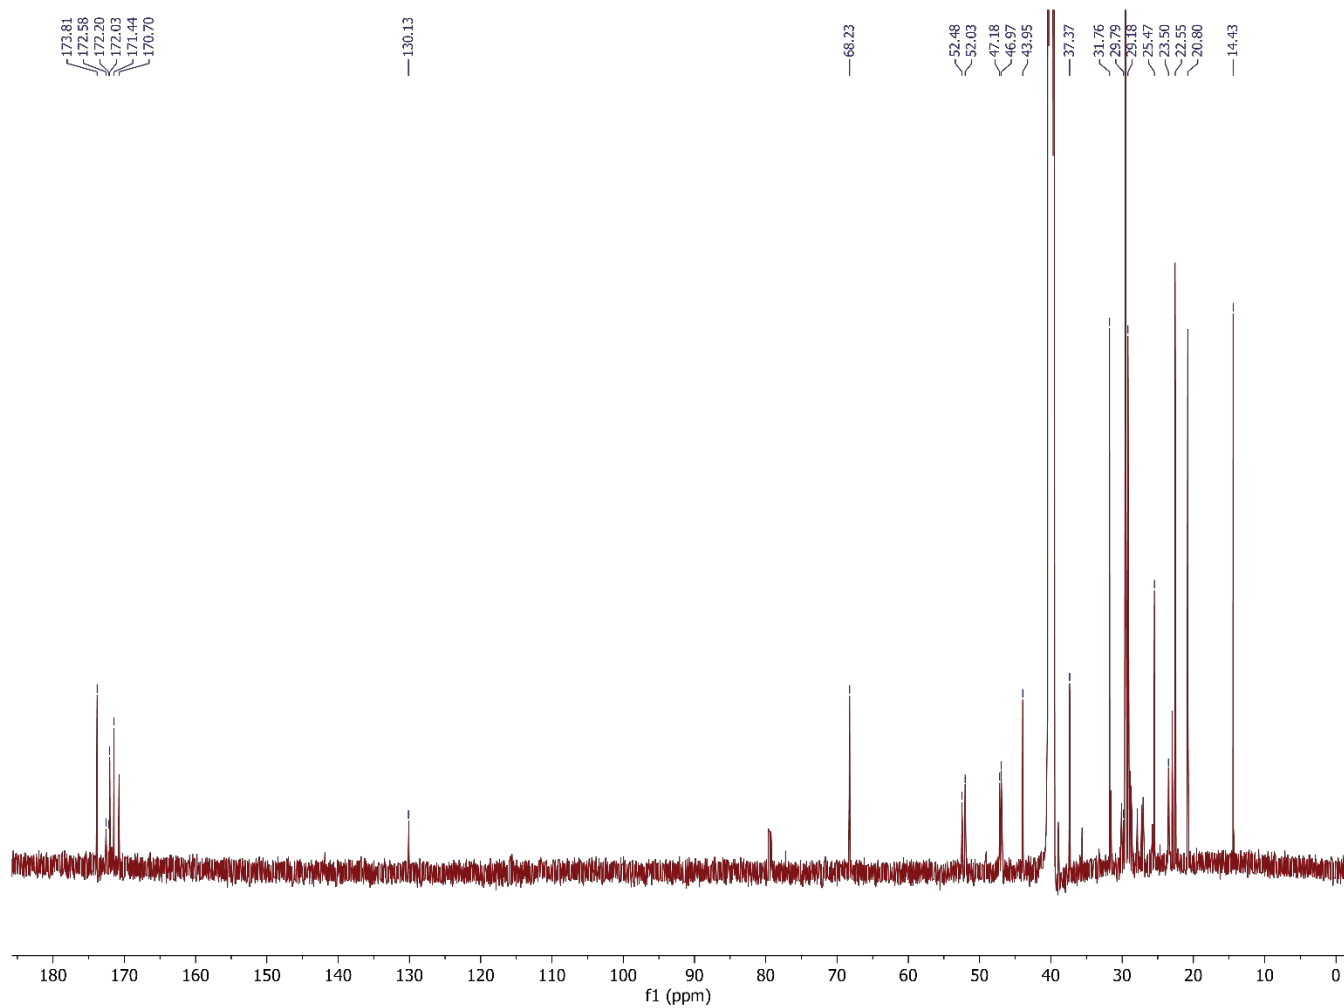

**Figure S6.** The  $^{13}\text{C}$  NMR spectrum of compound **1** (176 MHz,  $\text{DMSO-}d_6$ ).

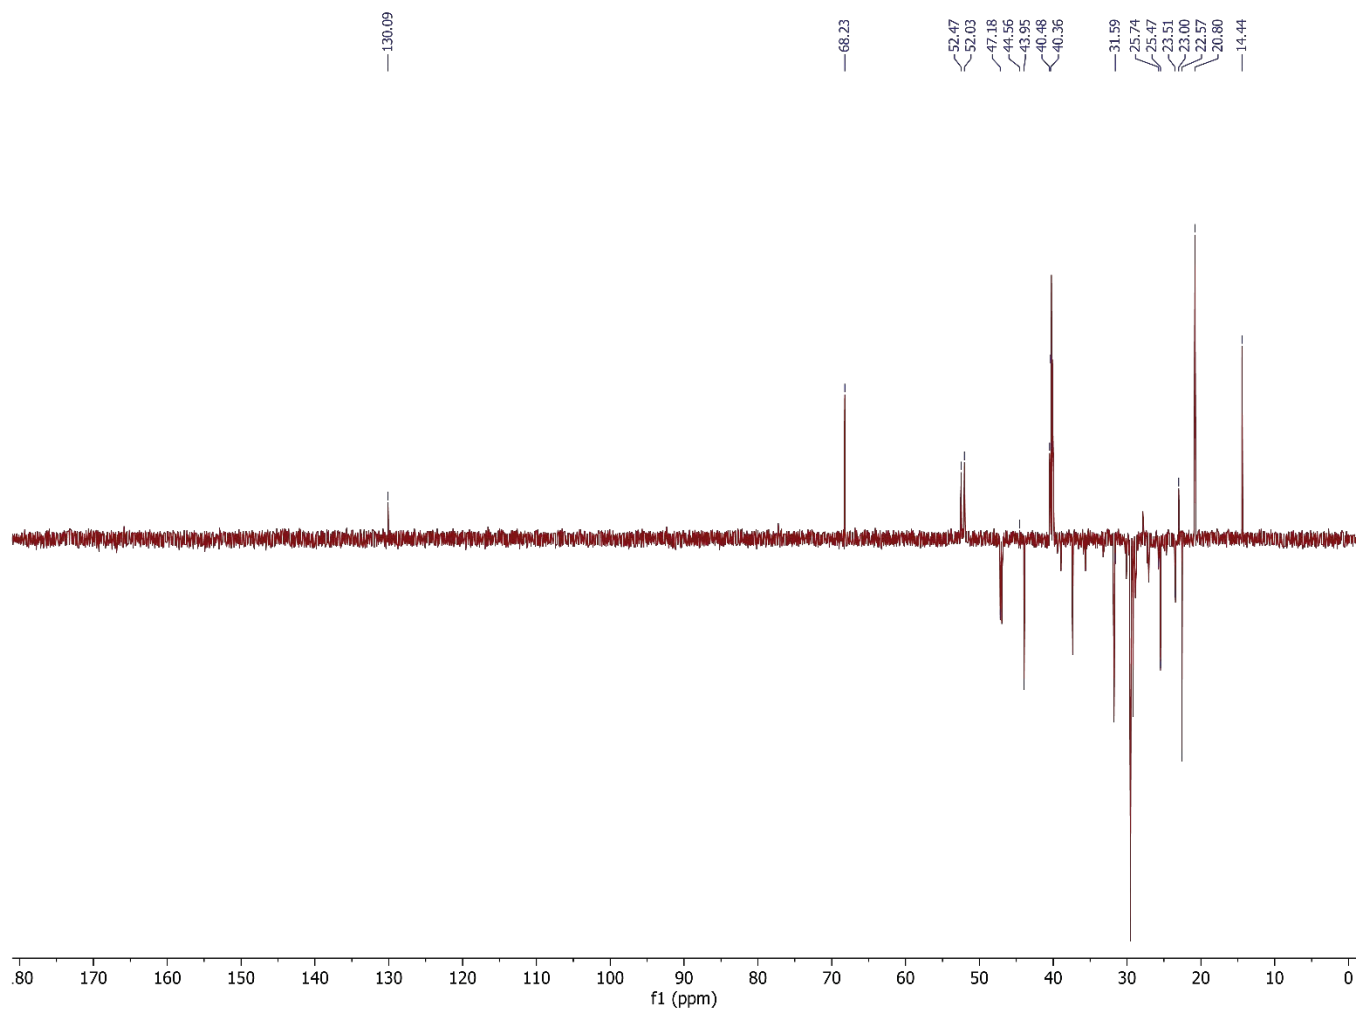

**Figure S7.** The DEPT135 NMR spectrum of compound **1** (176 MHz, DMSO- $d_6$ ).



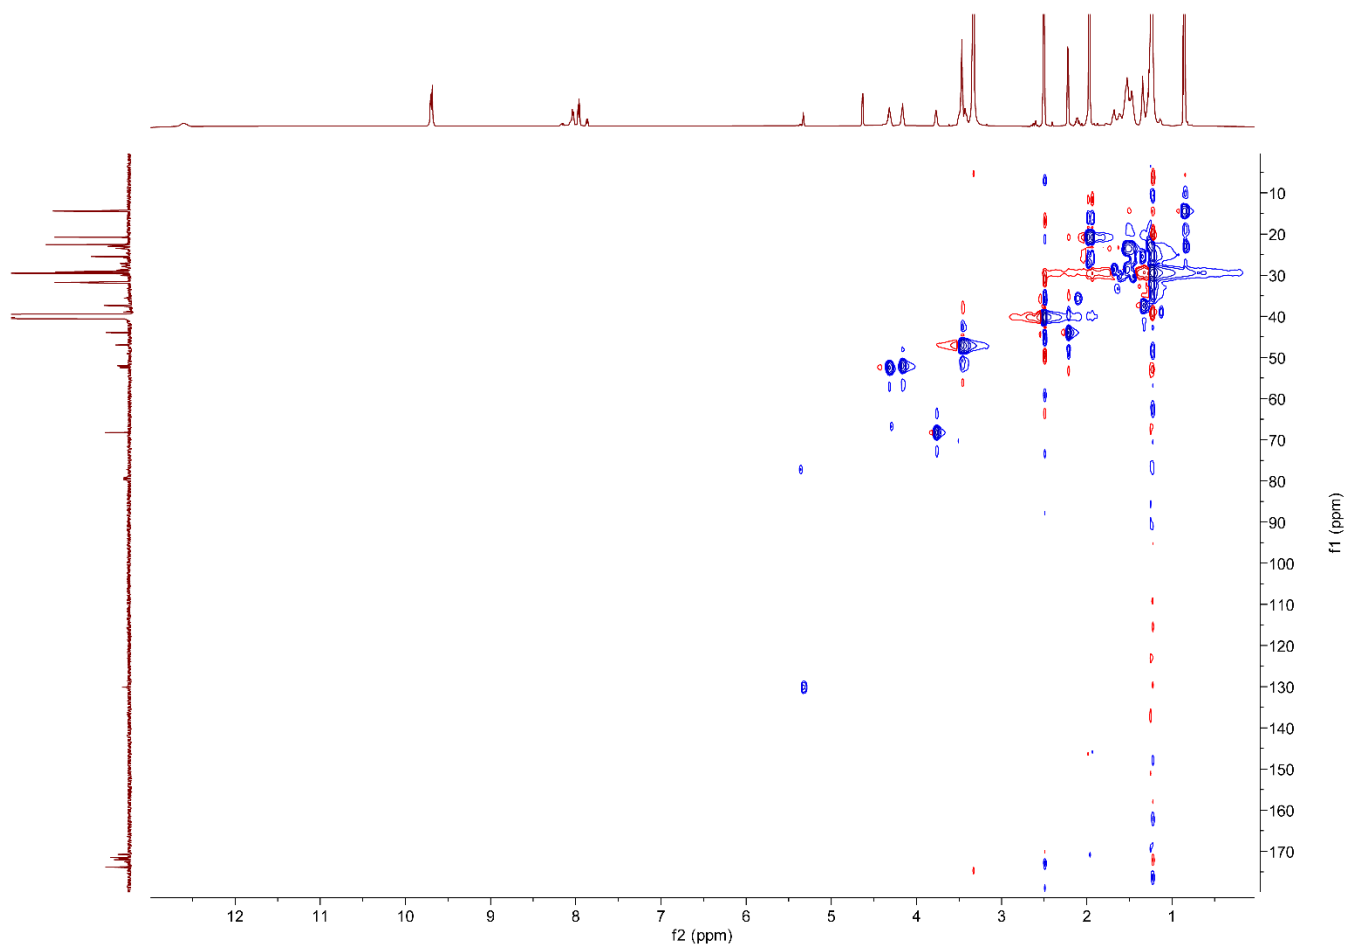

**Figure S8.** The HSQC spectrum of compound **1** (700 MHz, DMSO-  $d_6$ ).

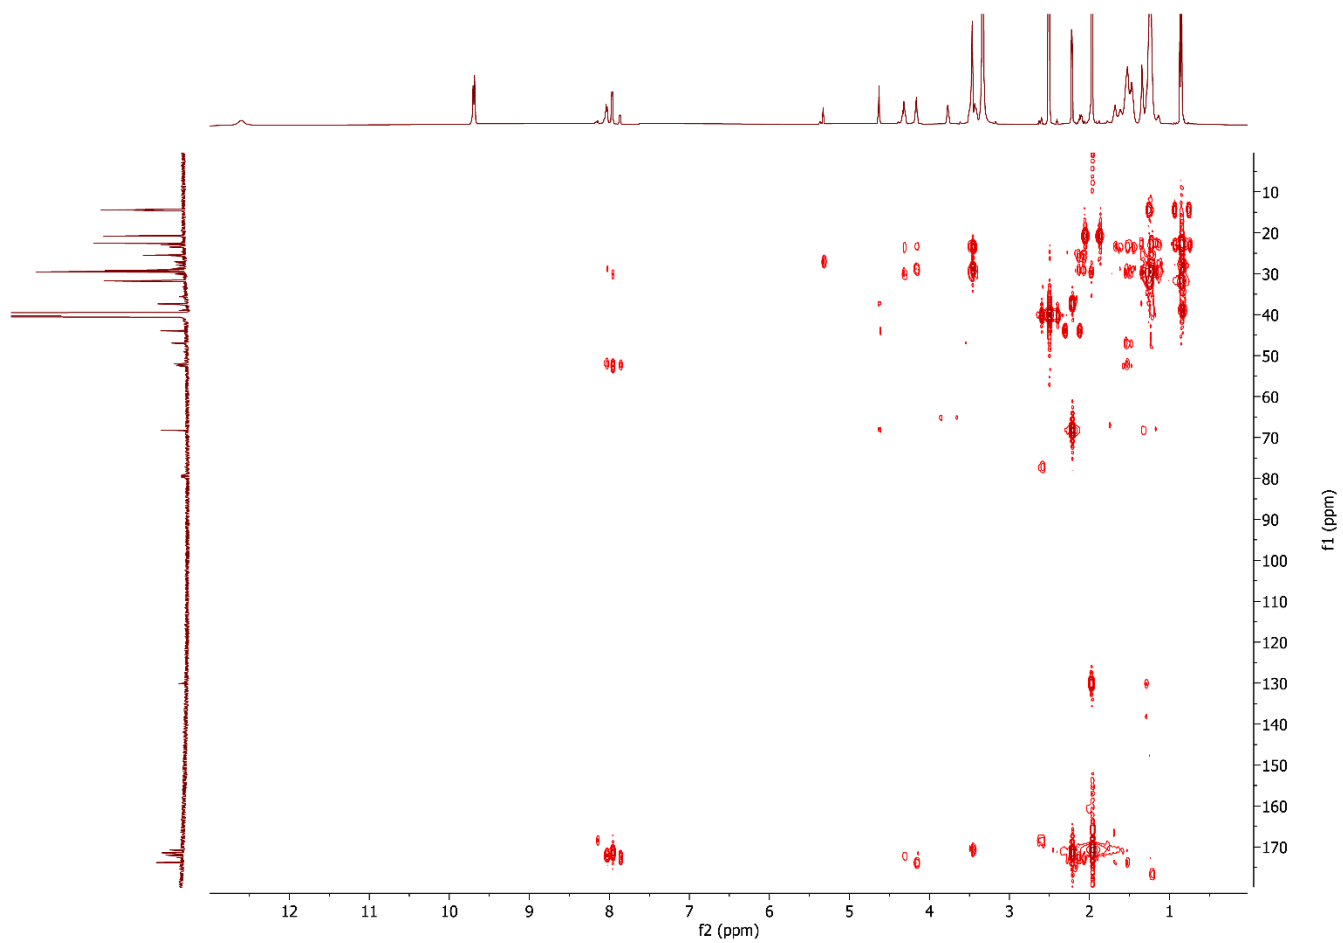

**Figure S9.** The HMBC spectrum of compound **1** (700 MHz, DMSO-  $d_6$ ).

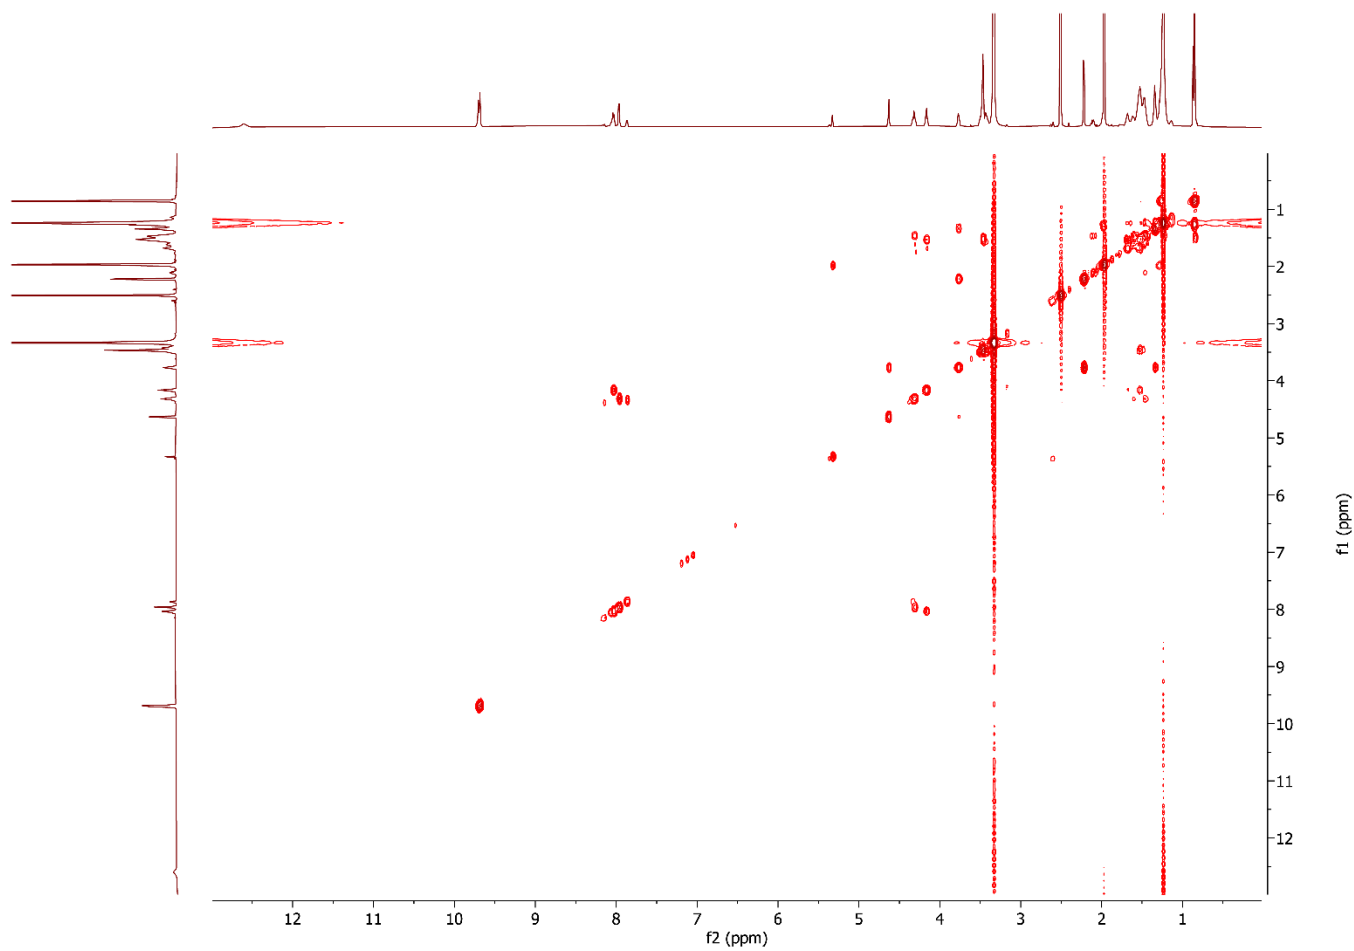

**Figure S10.** The  $^1\text{H}$ - $^1\text{H}$  COSY NMR spectrum of compound **1** (700 MHz,  $\text{DMSO}-d_6$ ).

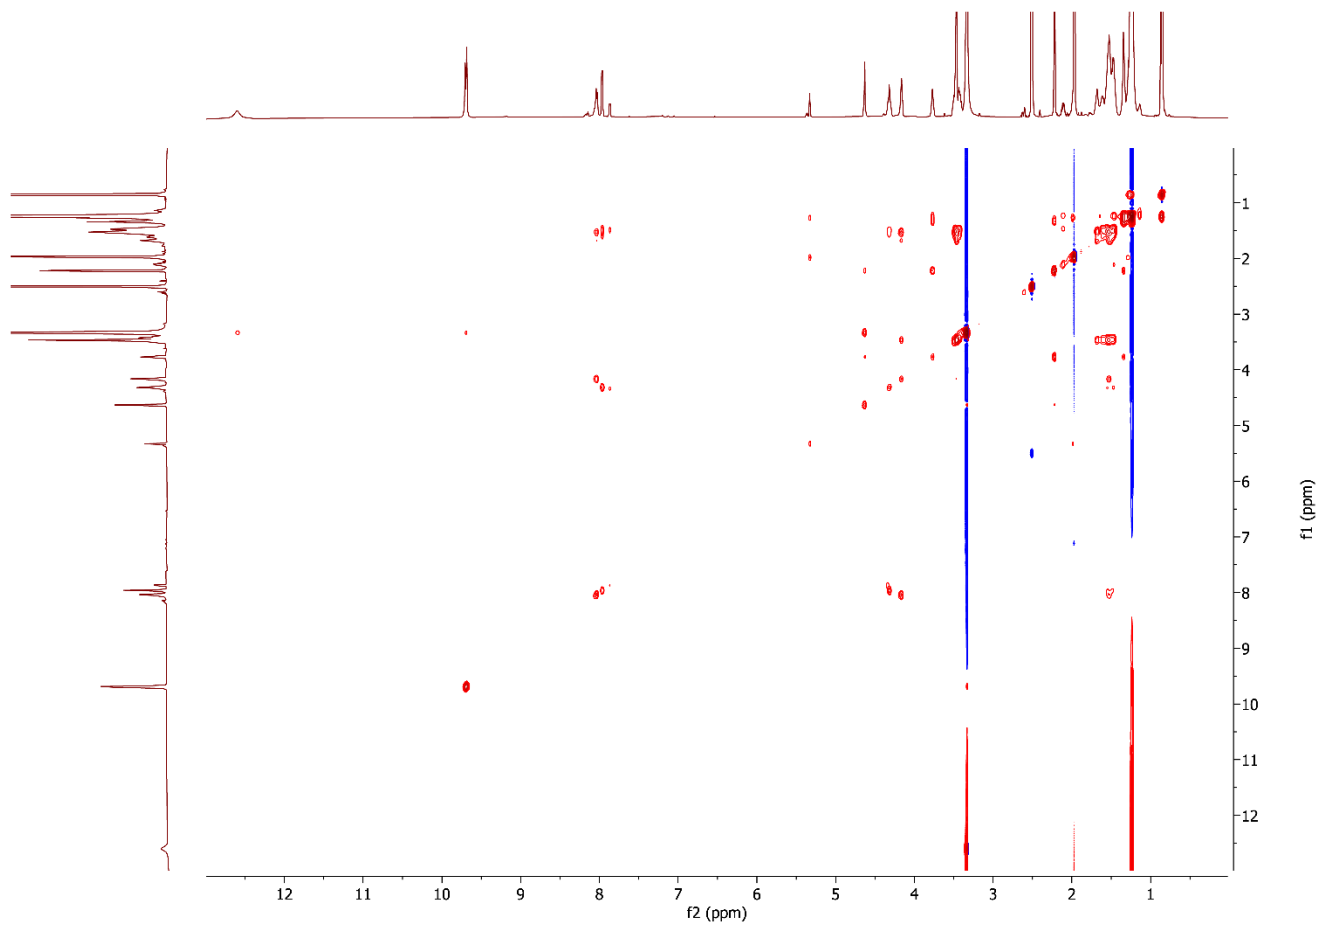

**Figure S11.** The  $^1\text{H}$ - $^1\text{H}$  TOCSY spectrum of compound **1** (700 MHz,  $\text{DMSO-}d_6$ ).

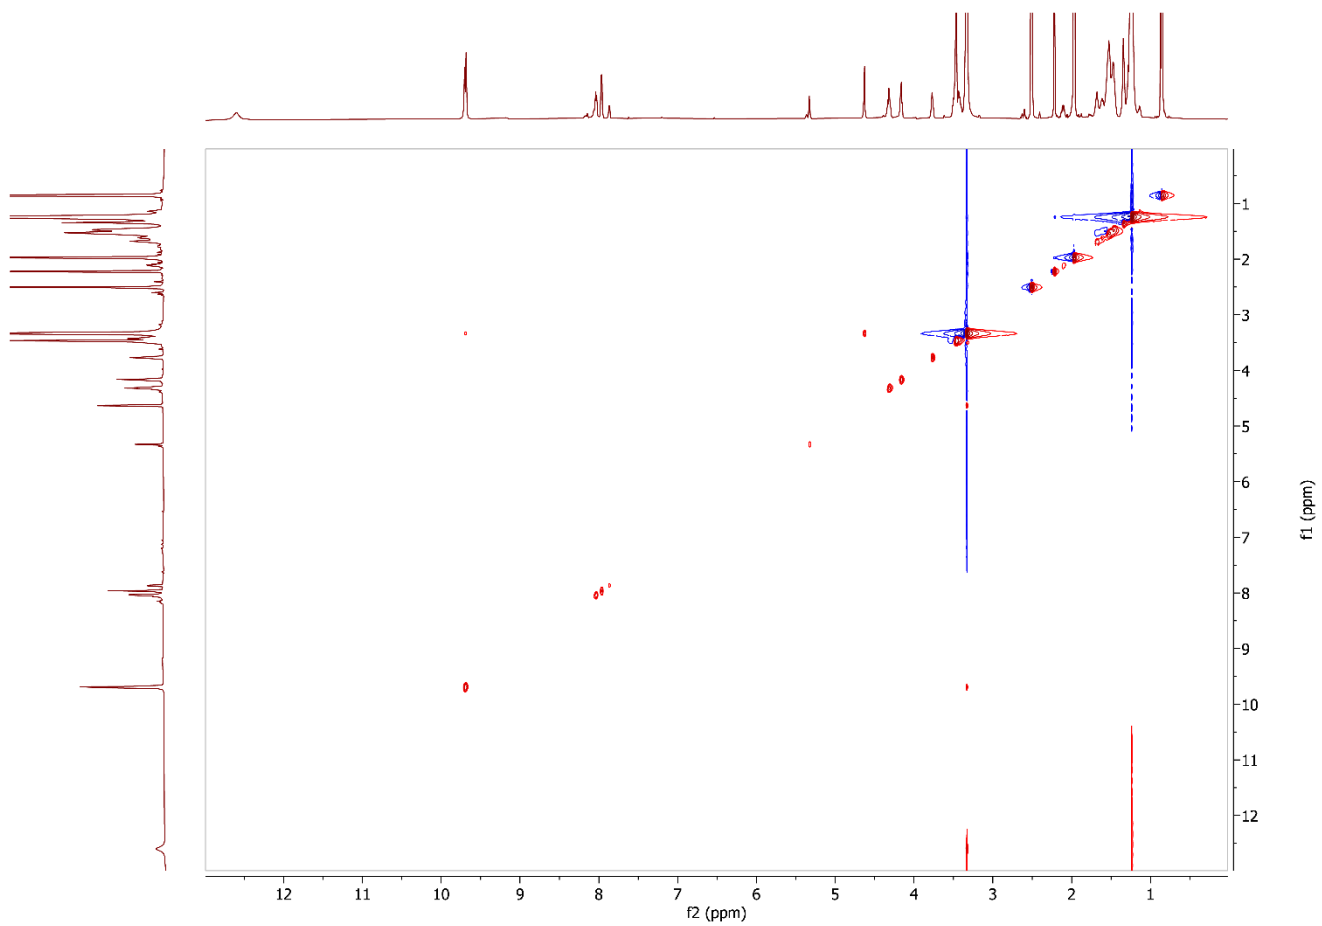

**Figure S12.** The ROESY spectrum of compound **1** (700 MHz, DMSO-*d*<sub>6</sub>).

### Amphibactin F

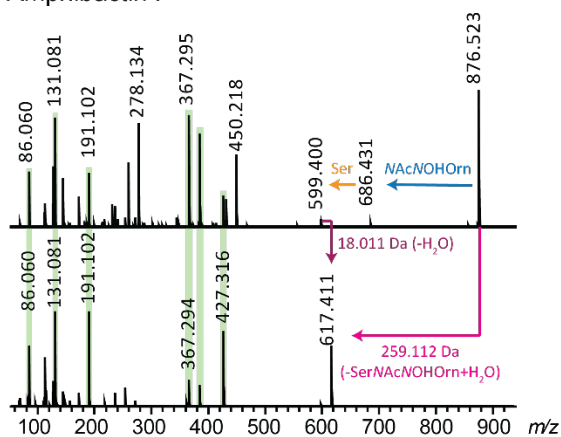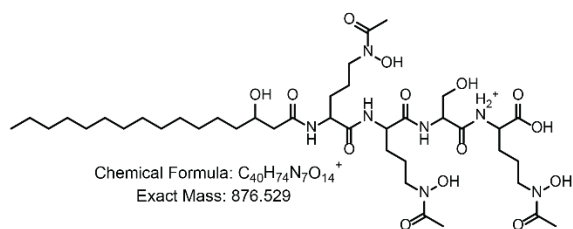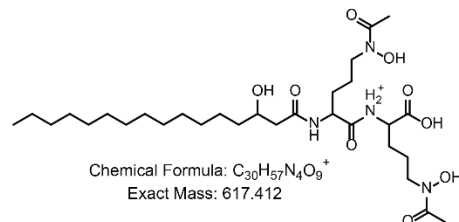

### Amphibactin B

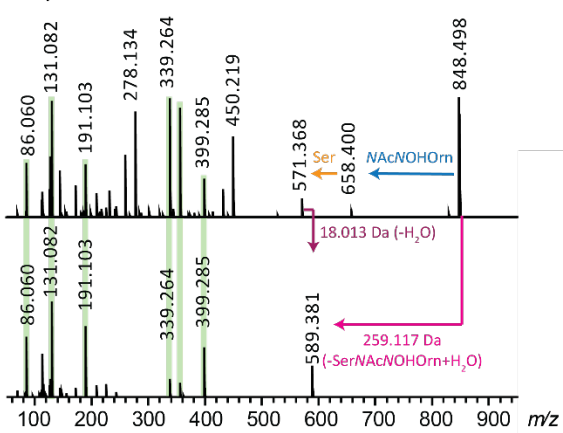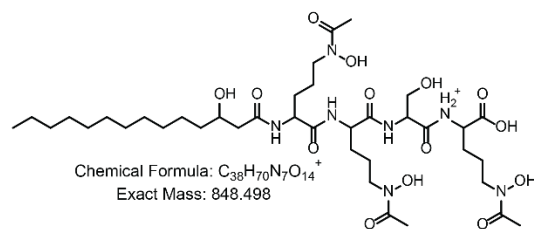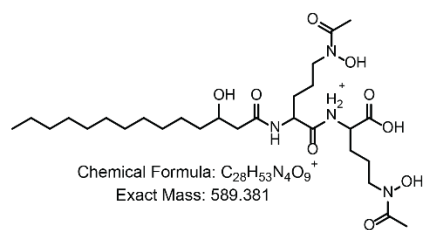

### Amphibactin C

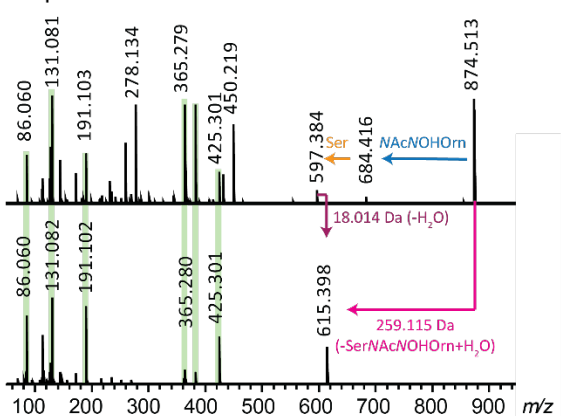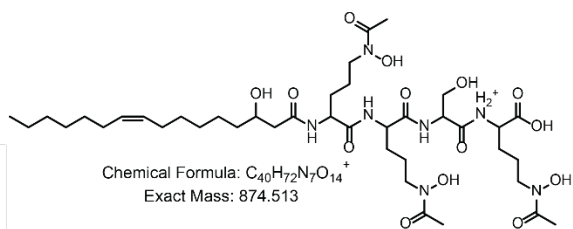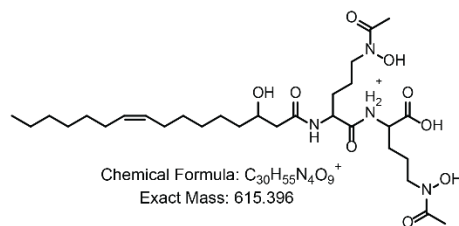

### Amphibactin D

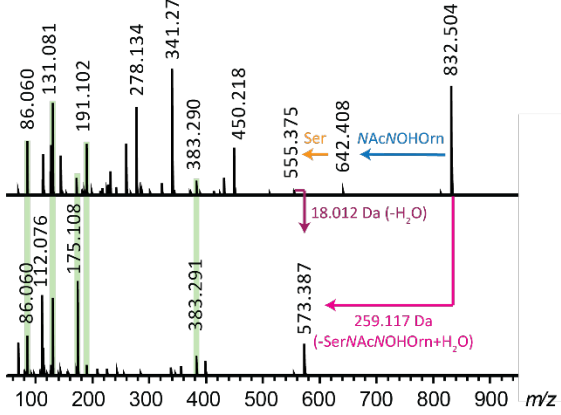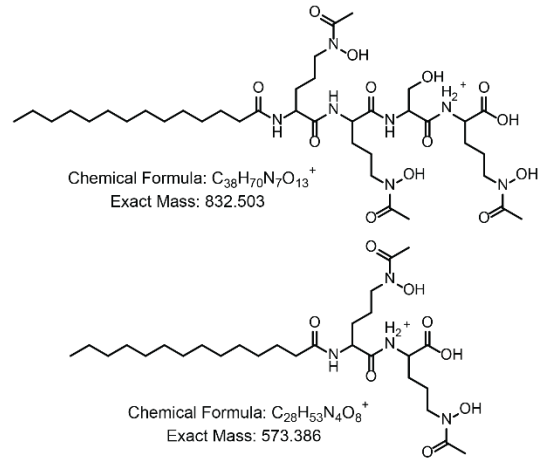

### Amphibactin E

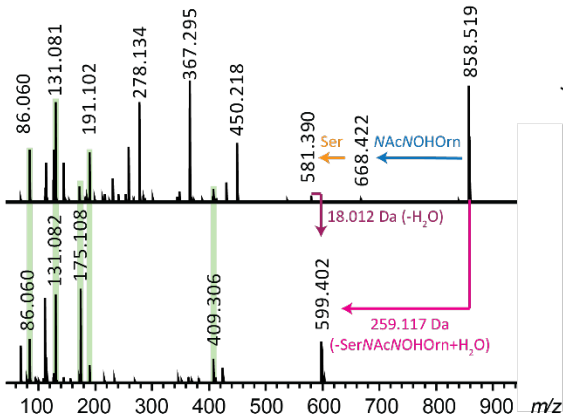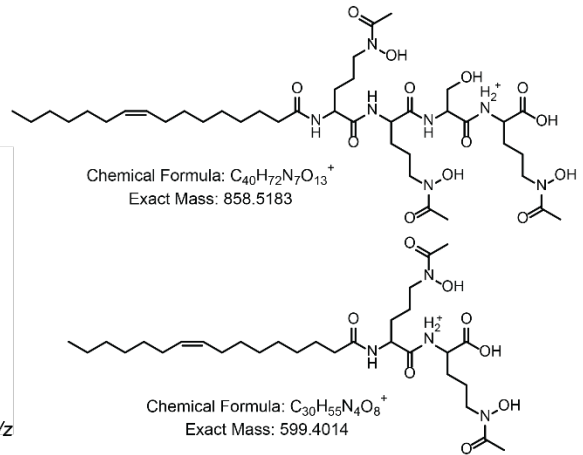

### Amphibactin G

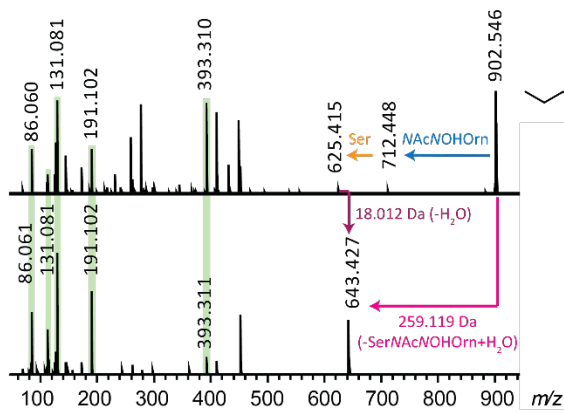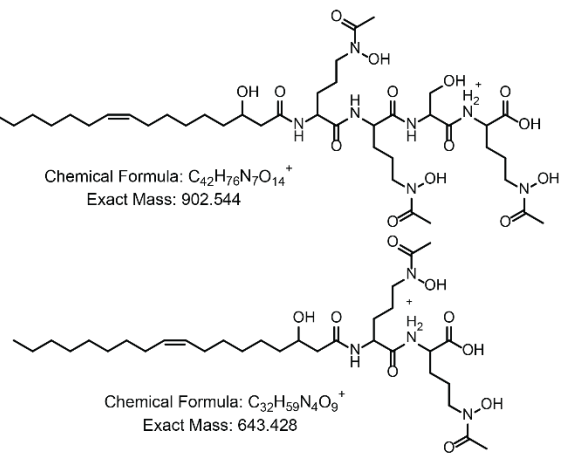

### Amphibactin H

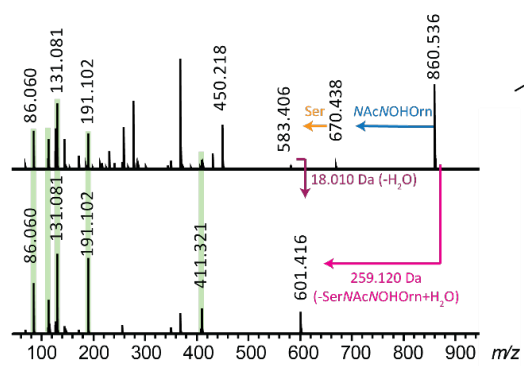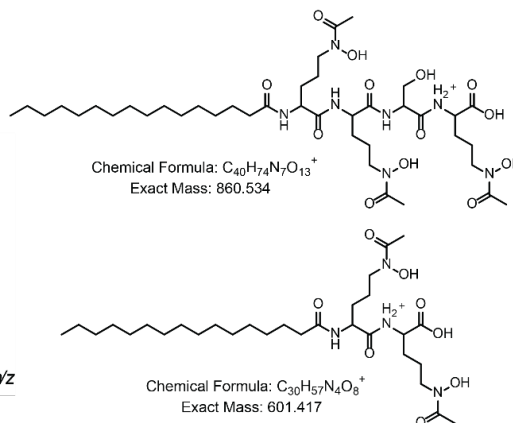

### Amphibactin I

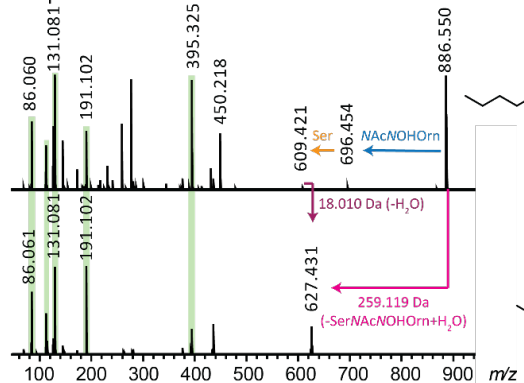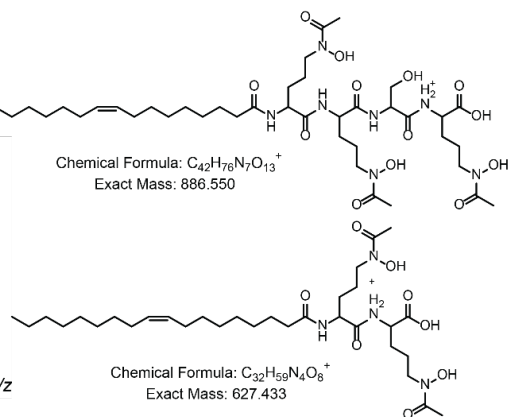

### Amphibactin V

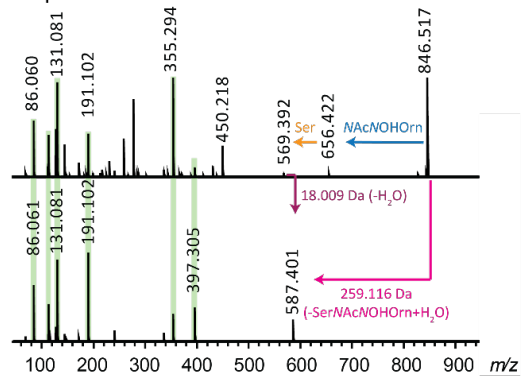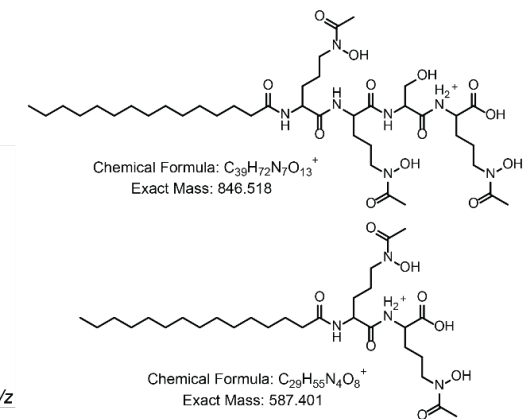

**Figure S13.** MS<sup>2</sup> spectral analysis of amphibactins and degradation products. The MS<sup>2</sup> mirror plots for amphibactin F, amphibactin B, amphibactin C, amphibactin D, amphibactin E, amphibactin G, amphibactin H, amphibactin I, amphibactin V, along with their respective degradation products are shown.



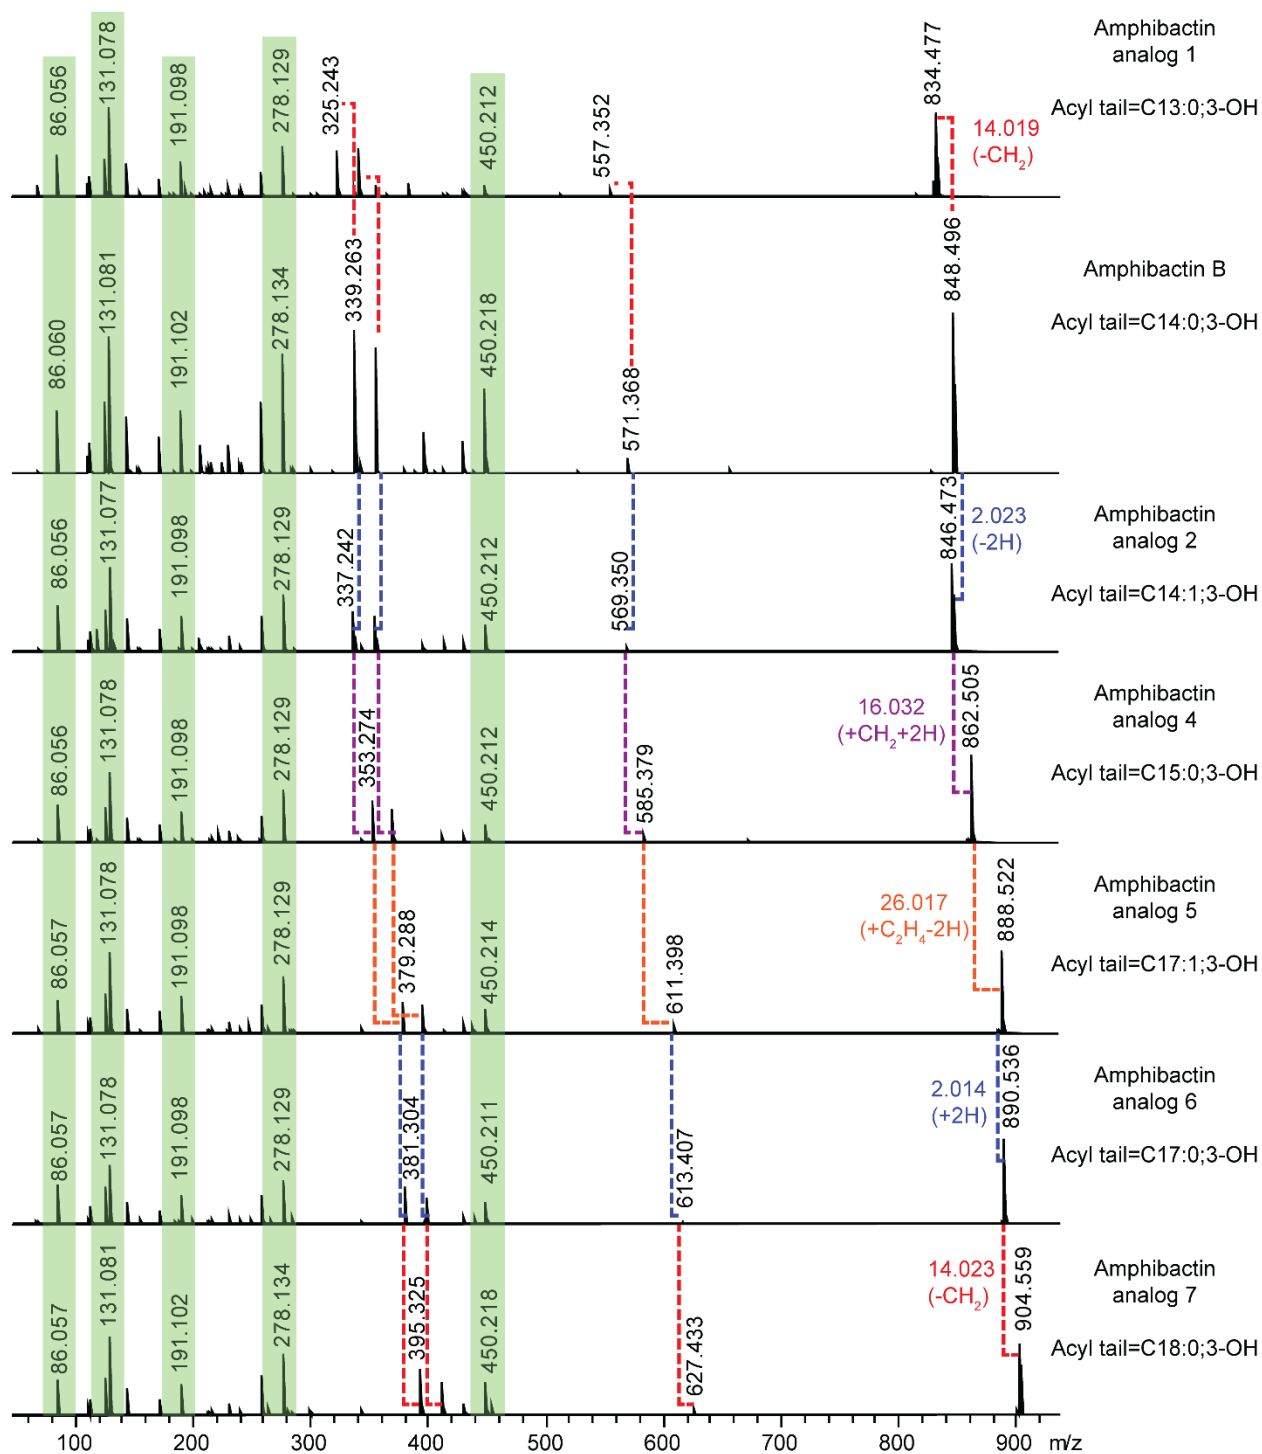

**Figure S14.** MS<sup>2</sup> spectral analysis of new amphibactin analogs, compared to amphibactin B. Conserved peaks are shown in green whereas mass shifts are shown in dashed lines. Amphibactin analog 3 was only detected in its degraded form and is therefore not shown here.

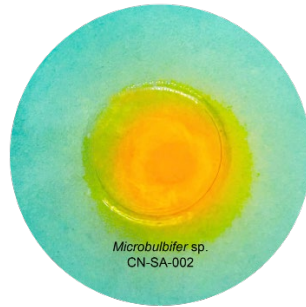

**Figure S15.** A petri plate showing iron acquisition by *Microbulbifer* sp. CNSA002 culture in O-CAS agar assay.

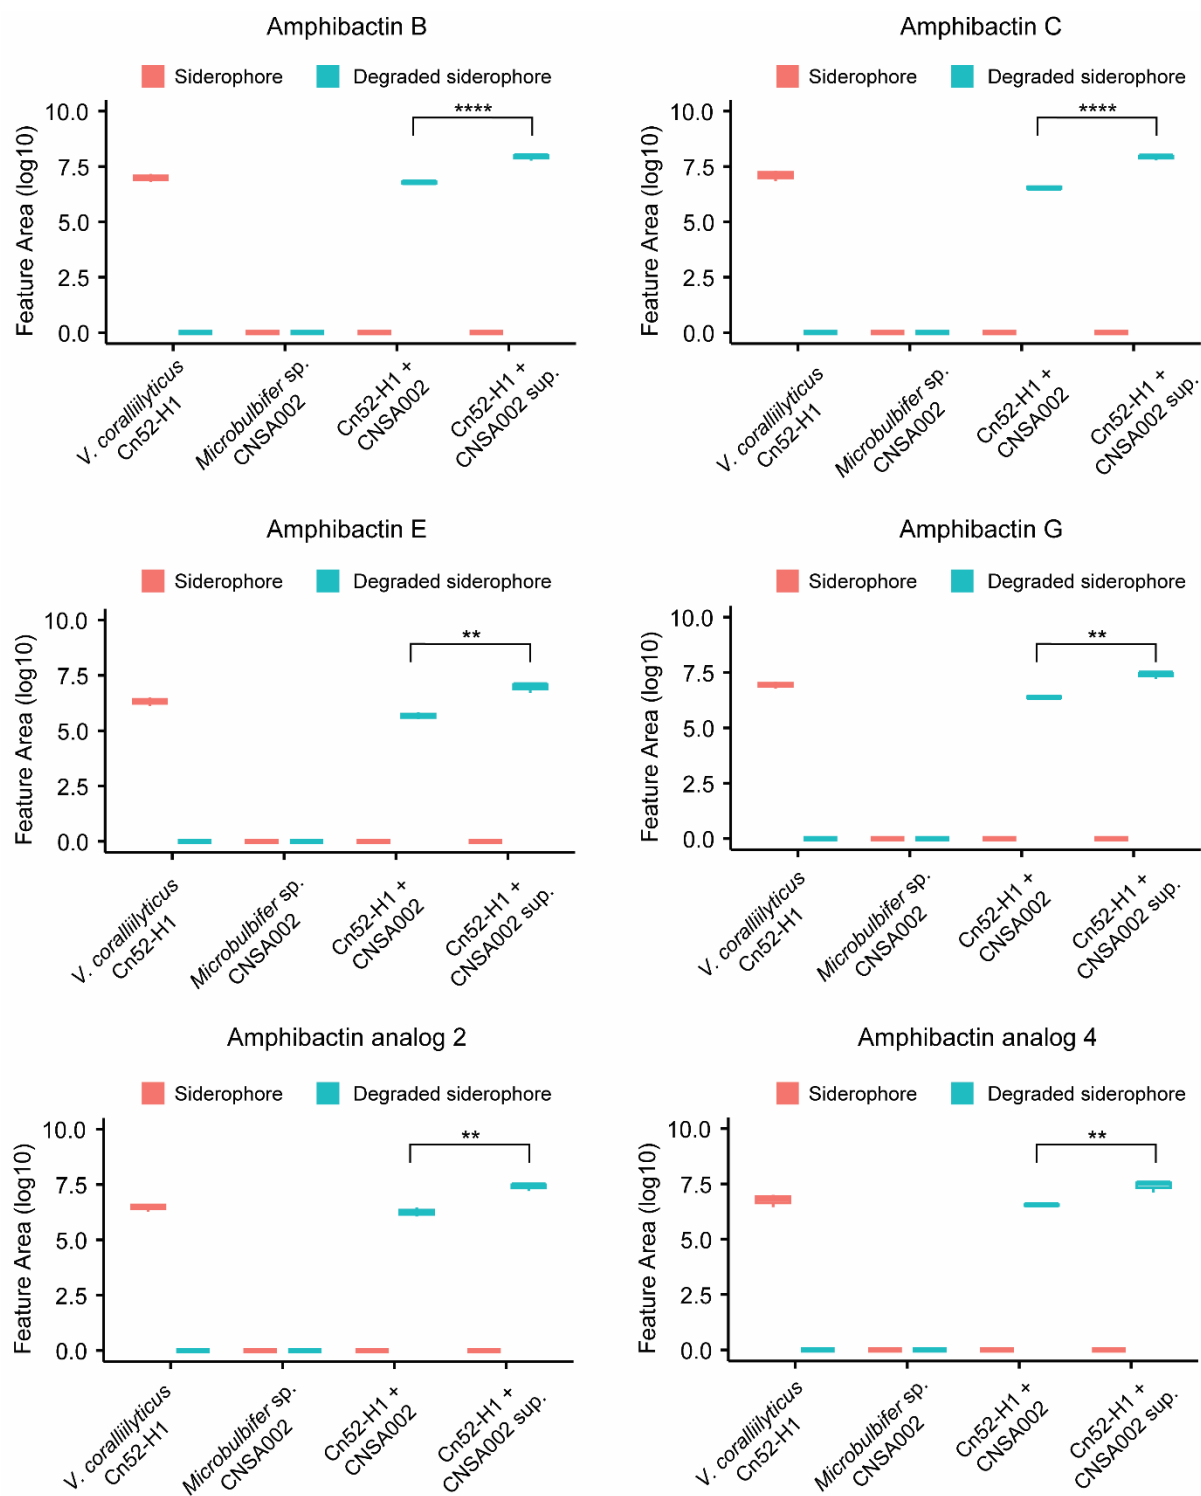

**Figure S16.** Detection of degraded amphibactins in *V. corallilyticus* Cn52-H1 in coculture with *Microbulbifer sp.* CNSA002 and supplemented with *Microbulbifer sp.* CNSA002 supernatant. Boxplots are shown for the relative abundances of amphibactin B, C, E, G, analog 2 and analog 4 degradation products ( $m/z$  589.381, 615.396, 599.401, 643.428, 587.365 and 603.396 respectively). Asterisks indicate significant differences between compared groups.

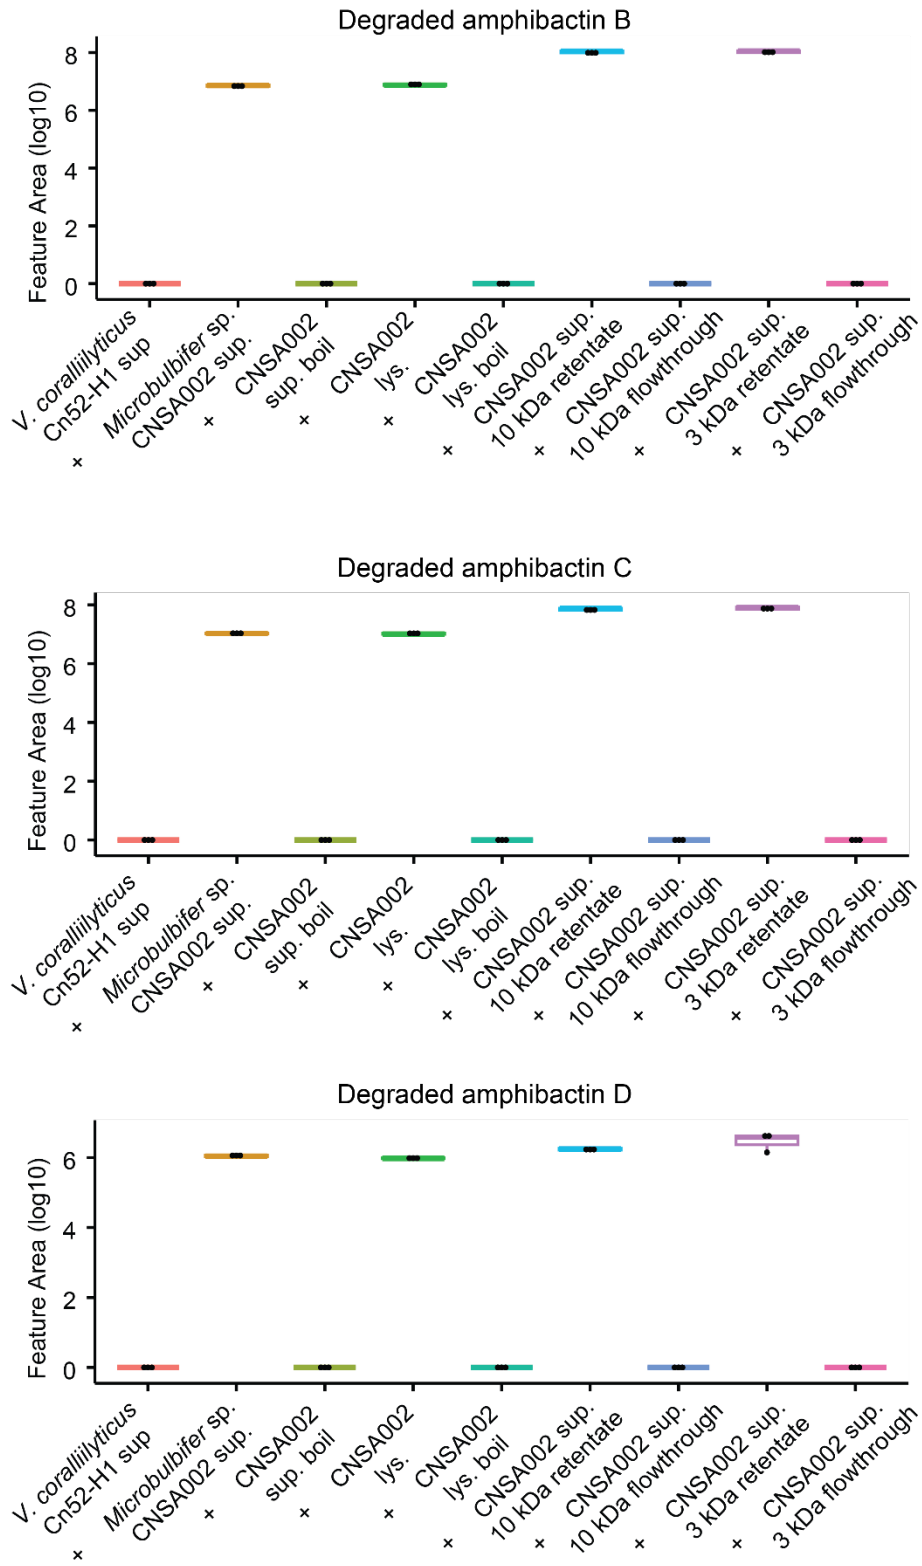

**Figure S17.** Detection of degraded amphibactins in *V. coralliilyticus* Cn52-H1 supernatant, supplemented with different *Microbulbifer* sp. CNSA002 fractions. Boxplots are shown for the

relative abundances of amphibactin B, C and D degradation products ( $m/z$  589.381, 615.396 and 573.386 respectively)

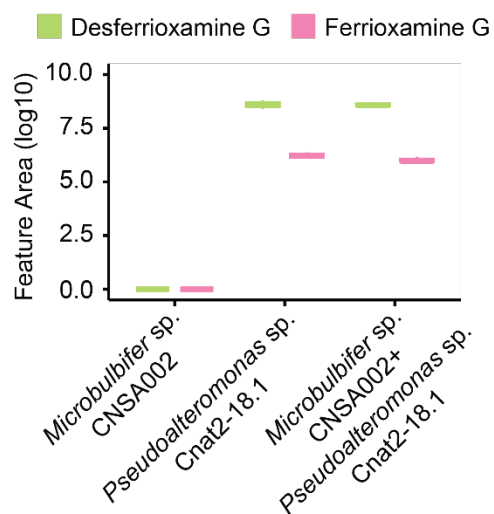

**Figure S18.** Boxplot of the relative abundances of desferrioxamine G and ferrioxamine G (619.366  $m/z$  and 672.277  $m/z$  respectively) in *Pseudoalteromonas* sp. Cnat2-18.1 and *Microbulbifer* sp. CNSA002 mono- and cocultures.

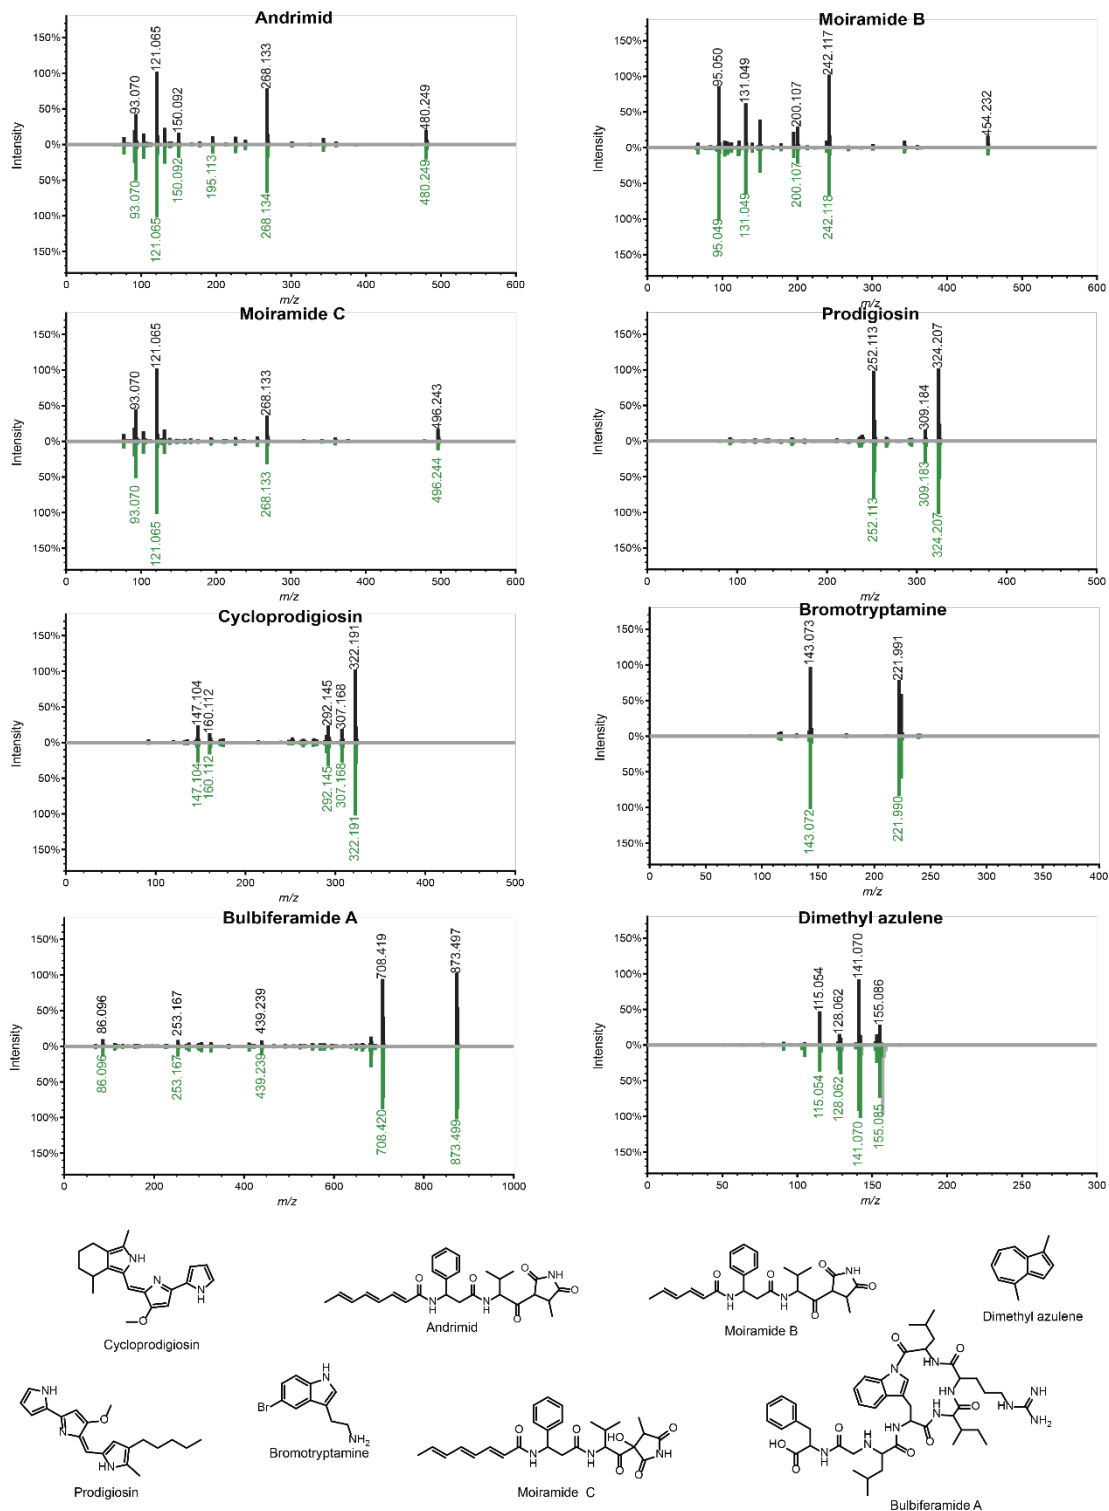

**Figure S19.** Mirror plots comparing experimental  $MS^2$  spectra of natural products detected in this study with spectra deposited in the GNPS library.

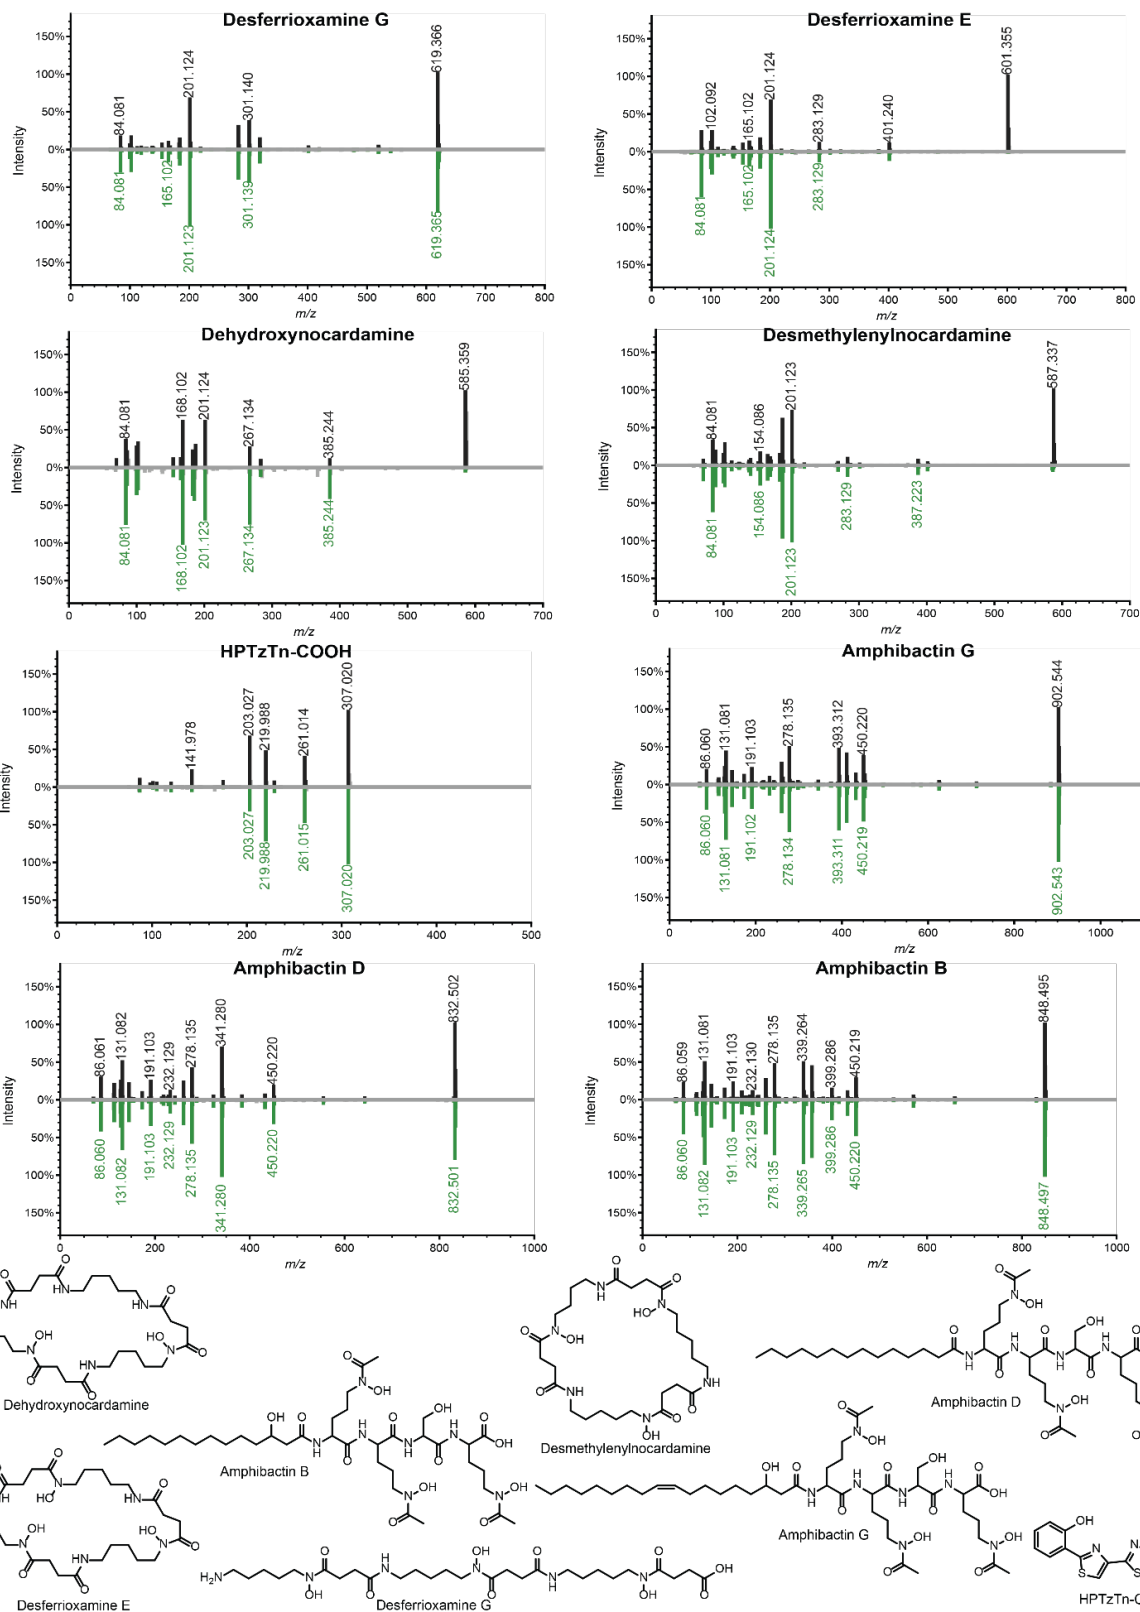

**Figure S20.** Mirror plots comparing experimental MS<sup>2</sup> spectra of hydroxamate siderophores and HPTzTn-COOH detected in this study with spectra deposited in the GNPS library.

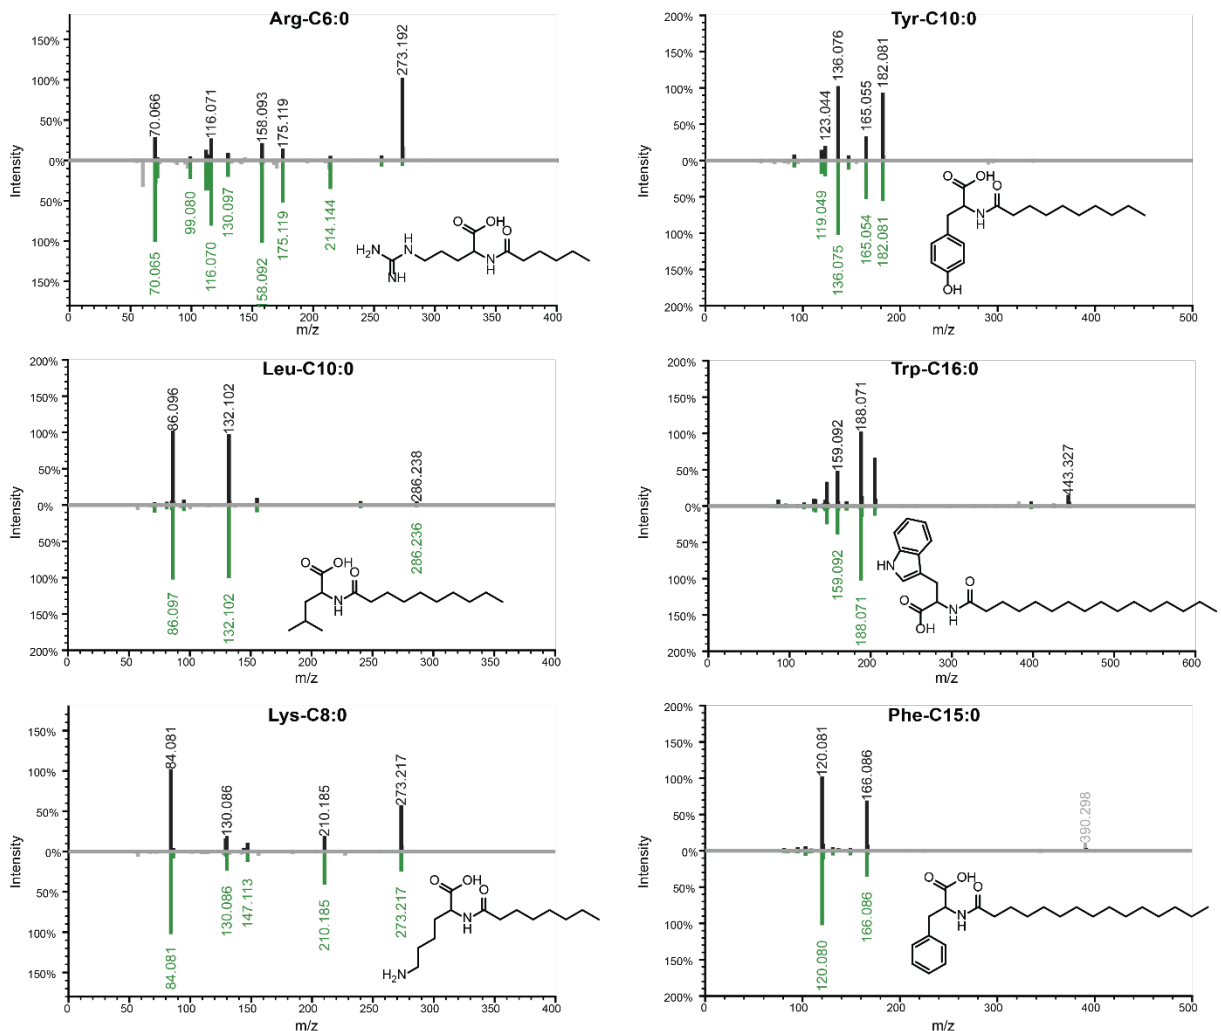

**Figure S21.** Mirror plots comparing experimental MS<sup>2</sup> spectra of *N*-acyl amides detected in this study with spectra deposited in the GNPS library.



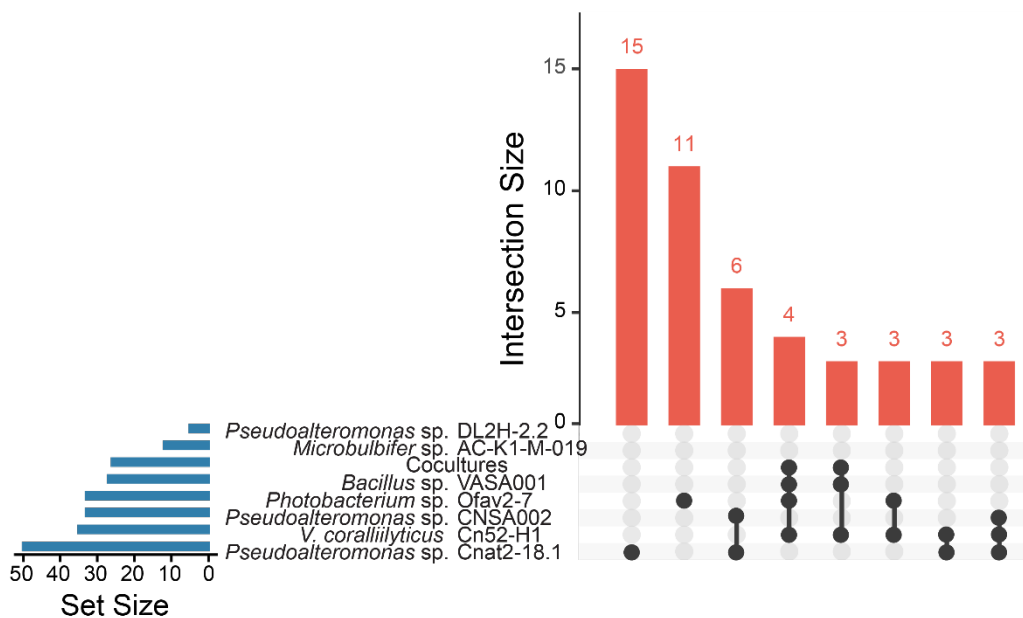

**Figure S22.** Upset plot for *N*-acyl amides detected in different mono- and cocultures. The top 8 intersections are shown for clarity.

**Table S1.** Putative annotation of top 50 features present in the *V. coralliilyticus* Cn52-H1 and *Microbulbifer* sp. CNSA002 coculture heatmap.

| <i>m/z</i> _RT | Formula (M)                                                     | Adduct               | Annotation/Compound class     | Source                 |
|----------------|-----------------------------------------------------------------|----------------------|-------------------------------|------------------------|
| 169.085_7.24   | -                                                               | [M+H] <sup>+</sup>   | <i>N</i> -acyl amides         | Annotation propagation |
| 226.620_6.08   | -                                                               | -                    | -                             | -                      |
| 241.143_12.10  | C <sub>13</sub> H <sub>20</sub> O <sub>4</sub>                  | [M+H] <sup>+</sup>   | Fatty acyl                    | CANOPUS                |
| 250.647_5.26   | -                                                               | -                    | -                             | -                      |
| 253.131_6.08   | C <sub>11</sub> H <sub>16</sub> N <sub>4</sub> O <sub>3</sub>   | [M+H] <sup>+</sup>   | His-Pro                       | CANOPUS                |
| 253.689_7.40   | -                                                               | -                    | -                             | -                      |
| 262.137_6.06   | C <sub>22</sub> H <sub>21</sub> N <sub>2</sub> O <sub>3</sub> S | [M+H] <sup>+</sup>   | Dipeptide                     | CANOPUS                |
| 267.686_7.39   | -                                                               | -                    | -                             | -                      |
| 283.238_10.92  | C <sub>16</sub> H <sub>30</sub> N <sub>2</sub> O <sub>2</sub>   | [M+H] <sup>+</sup>   | <i>N</i> -acyl amides         | CANOPUS                |
| 284.197_4.81   | C <sub>14</sub> H <sub>25</sub> N <sub>3</sub> O <sub>3</sub>   | [M+H] <sup>+</sup>   | Proline and derivatives       | CANOPUS                |
| 284.626_6.79   | -                                                               | -                    | -                             | -                      |
| 286.144_9.43   | C <sub>17</sub> H <sub>19</sub> NO <sub>3</sub>                 | [M+H] <sup>+</sup>   | Phe-C8:3                      | Annotation propagation |
| 286.238_12.33  | C <sub>16</sub> H <sub>31</sub> NO <sub>3</sub>                 | [M+H] <sup>+</sup>   | Leu-C10:0                     | GNPS                   |
| 287.681_7.36   | -                                                               | -                    | Proline and derivatives       | Annotation propagation |
| 288.187_10.44  | C <sub>27</sub> H <sub>50</sub> N <sub>4</sub> O <sub>9</sub>   | [M+2H] <sup>2+</sup> | Degraded amphibactin analog 1 | Annotation propagation |
| 288.679_5.64   | -                                                               | -                    | <i>N</i> -acyl amides         | Annotation propagation |
| 294.679_5.96   | -                                                               | -                    | Peptide                       | Annotation propagation |
| 299.197_11.53  | C <sub>30</sub> H <sub>53</sub> N <sub>4</sub> O <sub>8</sub>   | [M+2H] <sup>2+</sup> | Degraded amphibactin analog 3 | CANOPUS                |
| 301.105_3.24   | C <sub>12</sub> H <sub>16</sub> N <sub>2</sub> O <sub>7</sub>   | [M+H] <sup>+</sup>   | Pyrimidine nucleoside         | CANOPUS                |
| 307.176_7.09   | C <sub>15</sub> H <sub>22</sub> N <sub>4</sub> O <sub>3</sub>   | [M+H] <sup>+</sup>   | Arg-C9:4                      | CANOPUS                |
| 309.210_12.32  | C <sub>30</sub> H <sub>56</sub> N <sub>4</sub> O <sub>9</sub>   | [M+2H] <sup>2+</sup> | Degraded amphibactin F        | Annotation propagation |
| 309.684_6.19   | -                                                               | -                    | -                             | -                      |
| 310.167_23.77  | C <sub>17</sub> H <sub>27</sub> NS <sub>2</sub>                 | [M+H] <sup>+</sup>   |                               | SIRIUS                 |
| 314.659_8.03   | -                                                               | -                    | -                             | -                      |
| 316.674_6.22   | -                                                               | -                    | Peptide                       | Annotation propagation |
| 320.160_4.80   | C <sub>16</sub> H <sub>21</sub> N <sub>3</sub> O <sub>4</sub>   | [M+H] <sup>+</sup>   | Phe-Gly-Pro                   | CANOPUS                |
| 328.183_12.32  | C <sub>11</sub> H <sub>21</sub> N <sub>9</sub> O <sub>3</sub>   | [M+H] <sup>+</sup>   | <i>N</i> -acyl amides         | CANOPUS                |
| 329.254_8.49   | C <sub>16</sub> H <sub>32</sub> N <sub>4</sub> O <sub>3</sub>   | [M+H] <sup>+</sup>   | Arg-C10:0                     | GNPS                   |
| 333.202_12.69  | C <sub>18</sub> H <sub>30</sub> O <sub>4</sub>                  | [M+Na] <sup>+</sup>  | -                             | SIRIUS                 |
| 334.164_6.54   | C <sub>12</sub> H <sub>24</sub> N <sub>5</sub> O <sub>4</sub> P | [M+H] <sup>+</sup>   | <i>N</i> -acyl amides         | CANOPUS                |
| 334.183_12.15  | C <sub>12</sub> H <sub>19</sub> N <sub>11</sub> O               | [M+H] <sup>+</sup>   | Dialkylarylamides             | CANOPUS                |
| 337.189_12.32  | C <sub>21</sub> H <sub>24</sub> N <sub>2</sub> O <sub>2</sub>   | [M+H] <sup>+</sup>   | Amino acids and derivatives   | CANOPUS                |
| 339.169_6.39   | C <sub>20</sub> H <sub>22</sub> N <sub>2</sub> O <sub>3</sub>   | [M+H] <sup>+</sup>   | <i>N</i> -acyl amides         | CANOPUS                |
| 339.712_6.96   | -                                                               | -                    | -                             | -                      |
| 341.191_12.69  | C <sub>14</sub> H <sub>24</sub> N <sub>6</sub> O <sub>4</sub>   | [M+H] <sup>+</sup>   | <i>N</i> -acyl amides         | CANOPUS                |
| 345.220_6.78   | C <sub>12</sub> H <sub>26</sub> N <sub>9</sub> O <sub>3</sub>   | [M+H] <sup>+</sup>   | Peptide                       | CANOPUS                |
| 351.220_7.19   | C <sub>14</sub> H <sub>30</sub> N <sub>4</sub> O <sub>6</sub>   | [M+H] <sup>+</sup>   | Peptide                       | CANOPUS                |

| <b>m/z_RT</b> | <b>Formula (M)</b>                                              | <b>Adduct</b>      | <b>Annotation/Compound class</b>             | <b>Source</b> |
|---------------|-----------------------------------------------------------------|--------------------|----------------------------------------------|---------------|
| 356.710_6.66  | -                                                               | -                  | -                                            | -             |
| 358.177_7.80  | C <sub>19</sub> H <sub>23</sub> N <sub>3</sub> O <sub>4</sub>   | [M+H] <sup>+</sup> | Amino acids and derivatives                  |               |
| 365.684_6.26  | -                                                               | -                  | -                                            | -             |
| 378.713_7.75  | -                                                               | -                  | -                                            | -             |
| 421.281_7.40  | C <sub>22</sub> H <sub>36</sub> N <sub>4</sub> O <sub>4</sub>   | [M+H] <sup>+</sup> | Cyclo-(Pro) <sub>2</sub> -(Leu) <sub>2</sub> | CANOPUS       |
| 427.233_6.71  | C <sub>23</sub> H <sub>30</sub> N <sub>4</sub> O <sub>4</sub>   | [M+H] <sup>+</sup> | Peptide                                      | CANOPUS       |
| 452.218_6.45  | C <sub>25</sub> H <sub>29</sub> N <sub>3</sub> O <sub>5</sub>   | [M+H] <sup>+</sup> | Peptide                                      | CANOPUS       |
| 473.286_5.96  | C <sub>24</sub> H <sub>36</sub> N <sub>6</sub> O <sub>4</sub>   | [M+H] <sup>+</sup> | Oligopeptide                                 | CANOPUS       |
| 488.286_5.13  | C <sub>25</sub> H <sub>37</sub> N <sub>5</sub> O <sub>5</sub>   | [M+H] <sup>+</sup> | (Pro) <sub>2</sub> -Lys-Phe                  | CANOPUS       |
| 523.266_6.09  | C <sub>27</sub> H <sub>34</sub> N <sub>6</sub> O <sub>5</sub>   | [M+H] <sup>+</sup> | Oligopeptide                                 | CANOPUS       |
| 602.265_7.30  | C <sub>29</sub> H <sub>39</sub> N <sub>5</sub> O <sub>7</sub> S | [M+H] <sup>+</sup> | Met-(Ala) <sub>2</sub> -Phe-Tyr              | CANOPUS       |
| 677.330_6.39  | C <sub>35</sub> H <sub>44</sub> N <sub>6</sub> O <sub>8</sub>   | [M+H] <sup>+</sup> | (Pro) <sub>3</sub> -Gly-Phe-Tyr              | CANOPUS       |
| 746.355_5.07  | C <sub>43</sub> H <sub>47</sub> N <sub>5</sub> O <sub>7</sub>   | [M+H] <sup>+</sup> | Oligopeptide                                 | CANOPUS       |

**Table S2.** Putative annotation of 76 features uniquely detected in marine bacteria cocultures with *V. coralliilyticus* Cn52-H1.

| <i>m/z</i> _RT | Formula (M)                                                   | Adduct               | Annotation/<br>Compound<br>class      | Source  | GNPS Analog                                                                                                               | Samples             |
|----------------|---------------------------------------------------------------|----------------------|---------------------------------------|---------|---------------------------------------------------------------------------------------------------------------------------|---------------------|
| 283.118_9.67   | C <sub>14</sub> H <sub>18</sub> O <sub>6</sub>                | [M+H] <sup>+</sup>   | Benzenoids                            | CANOPUS | -                                                                                                                         | Cn52-H1+Cnat2-18.1  |
| 285.290_9.55   | C <sub>17</sub> H <sub>36</sub> N <sub>2</sub> O              | [M+H] <sup>+</sup>   | Fatty amide                           | CANOPUS | -                                                                                                                         | Cn52-H1+AC-K1-M-019 |
| 286.189_11.16  | -                                                             | -                    | -                                     | -       | -                                                                                                                         | Cn52-H1+CNSA002     |
| 287.086_10.37  | -                                                             | -                    | Ethylphenol<br>substructure           | MS2LDA  | 17- <i>epi</i> -<br>methandienone                                                                                         | Cn52-H1+Ofav2-7     |
| 287.204_14.50  | C <sub>16</sub> H <sub>30</sub> O <sub>2</sub> S              | [M+H] <sup>+</sup>   | Dialkylthioether                      | CANOPUS | -                                                                                                                         | Cn52-H1+Ofav2-7     |
| 289.170_8.20   | C <sub>20</sub> H <sub>20</sub> N <sub>2</sub>                | [M+H] <sup>+</sup>   | Alkylindole                           | CANOPUS | MMV676539 ( <i>N</i> -<br>[2-(1 <i>H</i> -Indol-3-<br>yl)ethyl]-2-oxo-<br>2 <i>H</i> -1-<br>benzopyran-3-<br>carboxamide) | Cn52-H1+AC-K1-M-019 |
| 294.186_10.50  | C <sub>28</sub> H <sub>50</sub> N <sub>4</sub> O <sub>9</sub> | [M+2H] <sup>2+</sup> | Degraded<br>amphibactin<br>analog 1   | MS2LDA  | -                                                                                                                         | Cn52-H1+CNSA002     |
| 300.205_12.47  | C <sub>30</sub> H <sub>54</sub> N <sub>4</sub> O <sub>8</sub> | [M+2H] <sup>2+</sup> | Degraded<br>amphibactin E             | MS2LDA  | -                                                                                                                         | Cn52-H1+CNSA002     |
| 301.213_13.38  | C <sub>30</sub> H <sub>56</sub> N <sub>4</sub> O <sub>8</sub> | [M+2H] <sup>2+</sup> | Putative<br>degraded<br>amphibactin H | MS2LDA  | -                                                                                                                         | Cn52-H1+CNSA002     |
| 308.202_11.61  | C <sub>30</sub> H <sub>54</sub> N <sub>4</sub> O <sub>9</sub> | [M+2H] <sup>2+</sup> | Degraded<br>amphibactin C             | MS2LDA  | -                                                                                                                         | Cn52-H1+CNSA002     |
| 316.218_12.99  | C <sub>31</sub> H <sub>58</sub> N <sub>4</sub> O <sub>9</sub> | [M+2H] <sup>2+</sup> | Degraded<br>amphibactin<br>analog 4   | MS2LDA  | -                                                                                                                         | Cn52-H1+CNSA002     |
| 320.259_10.10  | C <sub>20</sub> H <sub>33</sub> NO <sub>2</sub>               | [M+H] <sup>+</sup>   | <i>N</i> -acyl amines                 | CANOPUS | PABA-C17:1                                                                                                                | Cn52-H1+Ofav2-7     |
| 322.218_12.79  | C <sub>32</sub> H <sub>58</sub> N <sub>4</sub> O <sub>9</sub> | [M+2H] <sup>2+</sup> | Degraded<br>amphibactin G             | MS2LDA  | -                                                                                                                         | Cn52-H1+CNSA002     |
| 336.158_10.44  | C <sub>14</sub> H <sub>26</sub> NO <sub>6</sub> P             | [M+H] <sup>+</sup>   | -                                     | SIRIUS  | -                                                                                                                         | Cn52-H1+Cnat2-18.1  |
| 342.189_11.93  | -                                                             | -                    | -                                     | -       | -                                                                                                                         | Cn52-H1+Cnat2-18.1  |
| 344.186_19.76  | -                                                             | -                    | -                                     | -       | -                                                                                                                         | Cn52-H1+DL2H-2.2    |
| 346.219_12.51  | C <sub>24</sub> H <sub>27</sub> NO                            | [M+H] <sup>+</sup>   | Benzenoids                            | CANOPUS | -                                                                                                                         | Cn52-H1+AC-K1-M-019 |

| <i>m/z</i> _RT | Formula (M)                                                   | Adduct              | Annotation/<br>Compound<br>class       | Source  | GNPS Analog                                                                                | Samples                            |
|----------------|---------------------------------------------------------------|---------------------|----------------------------------------|---------|--------------------------------------------------------------------------------------------|------------------------------------|
| 349.248_9.71   | C <sub>20</sub> H <sub>32</sub> N <sub>2</sub> O <sub>3</sub> | [M+H] <sup>+</sup>  | Amino acids<br>and derivatives         | CANOPUS | -                                                                                          | Cn52-H1+VASA001                    |
| 351.264_14.14  | C <sub>20</sub> H <sub>34</sub> N <sub>2</sub> O <sub>3</sub> | [M+H] <sup>+</sup>  | -                                      | SIRIUS  | -                                                                                          | Cn52-H1+Cnat2-18.1                 |
| 362.298_23.97  | -                                                             | -                   | -                                      | -       | -                                                                                          | Cn52-H1+Cnat2-18.1,Cn52-H1+CNSA002 |
| 365.303_18.63  | C <sub>21</sub> H <sub>42</sub> O <sub>3</sub>                | [M+Na] <sup>+</sup> | -                                      | SIRIUS  | -                                                                                          | Cn52-H1+Cnat2-18.1                 |
| 377.280_11.15  | C <sub>22</sub> H <sub>36</sub> N <sub>2</sub> O <sub>3</sub> | [M+H] <sup>+</sup>  | Amino acids<br>and derivatives         | CANOPUS | -                                                                                          | Cn52-H1+VASA001                    |
| 383.322_23.92  | -                                                             | -                   | -                                      | -       | -                                                                                          | Cn52-H1+Cnat2-18.1                 |
| 387.182_11.26  | C <sub>22</sub> H <sub>26</sub> O <sub>6</sub>                | [M+H] <sup>+</sup>  | Benzenoids                             | CANOPUS | -                                                                                          | Cn52-H1+Cnat2-18.1                 |
| 396.182_18.13  | C <sub>23</sub> H <sub>25</sub> NO <sub>5</sub>               | [M+H] <sup>+</sup>  | Piperidine                             | CANOPUS | -                                                                                          | Cn52-H1+Cnat2-18.1                 |
| 398.766_12.39  | -                                                             | -                   | Unannotated<br>motifs 547,<br>656, 661 | -       | -                                                                                          | Cn52-H1+AC-K1-M-019                |
| 399.695_8.63   | -                                                             | -                   | -                                      | -       | -                                                                                          | Cn52-H1+Cnat2-18.1                 |
| 401.270_11.25  | C <sub>14</sub> H <sub>36</sub> N <sub>6</sub> O <sub>7</sub> | [M+H] <sup>+</sup>  | Amino acids<br>and derivatives         | FBMN    | -                                                                                          | Cn52-H1+Cnat2-18.1                 |
| 406.703_9.27   |                                                               |                     | Alkylamine<br>substructure             | MS2LDA  | -                                                                                          | Cn52-H1+Cnat2-18.1                 |
| 409.192_15.37  | C <sub>27</sub> H <sub>24</sub> N <sub>2</sub> O <sub>2</sub> | [M+H] <sup>+</sup>  | Alkyl indole                           | CANOPUS | Ajmalicine                                                                                 | Cn52-H1+Cnat2-18.1                 |
| 411.322_18.49  | -                                                             | -                   | Unannotated<br>motifs 552, 656         | -       | -                                                                                          | Cn52-H1+AC-K1-M-019                |
| 418.283_17.68  | C <sub>22</sub> H <sub>35</sub> N <sub>5</sub> O <sub>3</sub> | [M+H] <sup>+</sup>  | Cyclohexylamin<br>es                   | CANOPUS | -                                                                                          | Cn52-H1+AC-K1-M-019                |
| 422.294_12.98  | C <sub>13</sub> H <sub>39</sub> N <sub>7</sub> O <sub>8</sub> | [M+H] <sup>+</sup>  | Amino acids<br>and derivatives         | FBMN    | -                                                                                          | Cn52-H1+Cnat2-18.1                 |
| 429.302_13.59  | C <sub>16</sub> H <sub>40</sub> N <sub>6</sub> O <sub>7</sub> | [M+H] <sup>+</sup>  | Amino acids<br>and derivatives         | FBMN    | -                                                                                          | Cn52-H1+Cnat2-18.1                 |
| 432.194_16.64  | C <sub>25</sub> H <sub>25</sub> N <sub>3</sub> O <sub>4</sub> | [M+H] <sup>+</sup>  | Benzodiazine                           | CANOPUS | -                                                                                          | Cn52-H1+Cnat2-18.1                 |
| 433.265_11.98  | C <sub>31</sub> H <sub>32</sub> N <sub>2</sub>                | [M+H] <sup>+</sup>  | Phenyl<br>piperidine                   | CANOPUS | Acetamide, <i>N</i> -[3-(acetyloxy)-22-oxo-16,23-cyclocholesta-5,16(23)-dien-26-yl]- (9Cl) | Cn52-H1+AC-K1-M-019                |

| <b>m/z_RT</b> | <b>Formula (M)</b>                                              | <b>Adduct</b>      | <b>Annotation/<br/>Compound<br/>class</b>   | <b>Source</b>             | <b>GNPS Analog</b> | <b>Samples</b>                                 |
|---------------|-----------------------------------------------------------------|--------------------|---------------------------------------------|---------------------------|--------------------|------------------------------------------------|
| 435.302_13.30 | C <sub>17</sub> H <sub>38</sub> N <sub>8</sub> O <sub>5</sub>   | [M+H] <sup>+</sup> | Amino acids<br>and derivatives              | FBMN                      | -                  | Cn52-H1+Cnat2-18.1                             |
| 436.309_14.16 | C <sub>14</sub> H <sub>41</sub> N <sub>7</sub> O <sub>8</sub>   | [M+H] <sup>+</sup> | Amino acids<br>and derivatives              | FBMN                      | -                  | Cn52-H1+Cnat2-<br>18.1,Cn52-H1+AC-K1-<br>M-019 |
| 442.310_13.85 | C <sub>15</sub> H <sub>39</sub> N <sub>9</sub> O <sub>6</sub>   | [M+H] <sup>+</sup> | Amino acids<br>and derivatives              | CANOPUS                   | -                  | Cn52-H1+Cnat2-18.1                             |
| 448.358_19.66 | C <sub>31</sub> H <sub>45</sub> NO                              | [M+H] <sup>+</sup> | Benzenoids                                  | CANOPUS                   | -                  | Cn52-H1+Ofav2-7                                |
| 448.749_13.05 | -                                                               | -                  | -                                           | -                         | -                  | Cn52-H1+Cnat2-18.1                             |
| 456.406_19.66 | C <sub>27</sub> H <sub>53</sub> NO <sub>3</sub>                 | [M+O+H]<br>+       | Ceramide                                    | CANOPUS                   | -                  | Cn52-H1+Cnat2-18.1                             |
| 462.765_14.38 | -                                                               | -                  | -                                           | -                         | -                  | Cn52-H1+Cnat2-18.1                             |
| 468.765_13.99 | -                                                               | -                  | -                                           | -                         | -                  | Cn52-H1+Cnat2-18.1                             |
| 470.179_8.62  | C <sub>19</sub> H <sub>28</sub> N <sub>5</sub> O <sub>7</sub> P | [M+H] <sup>+</sup> | Amino acids<br>and derivatives              | CANOPUS                   | -                  | Cn52-H1+Cnat2-18.1                             |
| 470.179_8.88  | C <sub>21</sub> H <sub>23</sub> N <sub>7</sub> O <sub>6</sub>   | [M+H] <sup>+</sup> | Amino acids<br>and derivatives              | CANOPUS                   | -                  | Cn52-H1+Cnat2-18.1                             |
| 472.358_16.83 | C <sub>33</sub> H <sub>45</sub> NO                              | [M+H] <sup>+</sup> | Steroid                                     | CANOPUS                   | Cyclopamine        | Cn52-H1+AC-K1-M-019                            |
| 491.288_8.43  | -                                                               | -                  | Leucine<br>substructure                     | MS2LDA                    | -                  | Cn52-H1+Cnat2-18.1                             |
| 509.843_12.54 | -                                                               | -                  | Unannotated<br>motifs 398,<br>552, 656, 661 | -                         | -                  | Cn52-H1+AC-K1-M-019                            |
| 516.327_16.89 | C <sub>37</sub> H <sub>41</sub> NO                              | [M+H] <sup>+</sup> | Benzenoids                                  | CANOPUS                   | -                  | Cn52-H1+AC-K1-M-019                            |
| 518.342_16.71 | -                                                               | -                  | -                                           | -                         | -                  | Cn52-H1+Cnat2-<br>18.1,Cn52-H1+AC-K1-<br>M-019 |
| 542.400_17.66 | C <sub>37</sub> H <sub>51</sub> NO <sub>2</sub>                 | [M+H] <sup>+</sup> | Benzenoids                                  | CANOPUS                   | -                  | Cn52-H1+AC-K1-M-019                            |
| 544.416_19.45 | C <sub>37</sub> H <sub>53</sub> NO <sub>2</sub>                 | [M+H] <sup>+</sup> | Steroid                                     | CANOPUS                   | -                  | Cn52-H1+AC-K1-M-019                            |
| 545.411_9.56  | C <sub>36</sub> H <sub>52</sub> N <sub>2</sub> O <sub>2</sub>   | [M+H] <sup>+</sup> | Steroid                                     | CANOPUS                   | -                  | Cn52-H1+AC-K1-M-019                            |
| 573.311_20.36 | -                                                               | -                  | -                                           | -                         | -                  | Cn52-H1+Ofav2-<br>7,Cn52-H1+Cnat2-18.1         |
| 573.386_12.06 | C <sub>28</sub> H <sub>52</sub> N <sub>4</sub> O <sub>8</sub>   | [M+H] <sup>+</sup> | Degraded<br>amphibactin D                   | Annotation<br>propagation | -                  | Cn52-H1+CNSA002                                |

| <b>m/z_RT</b> | <b>Formula (M)</b>                                            | <b>Adduct</b>      | <b>Annotation/<br/>Compound<br/>class</b> | <b>Source</b>          | <b>GNPS Analog</b> | <b>Samples</b>      |
|---------------|---------------------------------------------------------------|--------------------|-------------------------------------------|------------------------|--------------------|---------------------|
| 587.366_10.50 | C <sub>28</sub> H <sub>50</sub> N <sub>4</sub> O <sub>9</sub> | [M+H] <sup>+</sup> | Degraded amphibactin analog 1             | Annotation propagation | -                  | Cn52-H1+CNSA002     |
| 587.401_12.70 | C <sub>29</sub> H <sub>54</sub> N <sub>4</sub> O <sub>8</sub> | [M+H] <sup>+</sup> | Degraded amphibactin V                    | Annotation propagation | -                  | Cn52-H1+CNSA002     |
| 589.381_11.11 | C <sub>28</sub> H <sub>52</sub> N <sub>4</sub> O <sub>9</sub> | [M+H] <sup>+</sup> | Degraded amphibactin B                    | Annotation propagation | -                  | Cn52-H1+CNSA002     |
| 599.402_12.48 | C <sub>30</sub> H <sub>54</sub> N <sub>4</sub> O <sub>8</sub> | [M+H] <sup>+</sup> | Degraded amphibactin E                    | Annotation propagation | -                  | Cn52-H1+CNSA002     |
| 601.417_12.25 | C <sub>30</sub> H <sub>56</sub> N <sub>4</sub> O <sub>8</sub> | [M+H] <sup>+</sup> | Putative degraded amphibactin H           | Annotation propagation | -                  | Cn52-H1+CNSA002     |
| 601.417_13.36 | C <sub>30</sub> H <sub>56</sub> N <sub>4</sub> O <sub>8</sub> | [M+H] <sup>+</sup> | Putative degraded amphibactin H           | Annotation propagation | -                  | Cn52-H1+CNSA002     |
| 603.397_11.78 | C <sub>29</sub> H <sub>54</sub> N <sub>4</sub> O <sub>9</sub> | [M+H] <sup>+</sup> | Degraded amphibactin analog 2             | Annotation propagation | -                  | Cn52-H1+CNSA002     |
| 612.410_11.77 | -                                                             | -                  | Unannotated motifs 547, 567               | -                      | -                  | Cn52-H1+AC-K1-M-019 |
| 615.397_11.62 | C <sub>30</sub> H <sub>54</sub> N <sub>4</sub> O <sub>9</sub> | [M+H] <sup>+</sup> | Degraded amphibactin C                    | Annotation propagation | -                  | Cn52-H1+CNSA002     |
| 617.412_12.42 | C <sub>30</sub> H <sub>56</sub> N <sub>4</sub> O <sub>9</sub> | [M+H] <sup>+</sup> | Degraded amphibactin F                    | NMR                    | -                  | Cn52-H1+CNSA002     |
| 627.433_12.64 | C <sub>32</sub> H <sub>58</sub> N <sub>4</sub> O <sub>8</sub> | [M+H] <sup>+</sup> | Putative degraded amphibactin I           | Annotation propagation | Desferrichrome     | Cn52-H1+CNSA002     |
| 627.433_13.70 | C <sub>32</sub> H <sub>58</sub> N <sub>4</sub> O <sub>8</sub> | [M+H] <sup>+</sup> | Putative degraded amphibactin I           | Annotation propagation | -                  | Cn52-H1+CNSA002     |
| 629.412_12.24 | C <sub>31</sub> H <sub>56</sub> N <sub>4</sub> O <sub>9</sub> | [M+H] <sup>+</sup> | Degraded amphibactin analog 3             | Annotation propagation | -                  | Cn52-H1+CNSA002     |
| 631.427_12.98 | C <sub>31</sub> H <sub>58</sub> N <sub>4</sub> O <sub>9</sub> | [M+H] <sup>+</sup> | Degraded amphibactin analog 4             | Annotation propagation | -                  | Cn52-H1+CNSA002     |
| 643.427_12.80 | C <sub>32</sub> H <sub>58</sub> N <sub>4</sub> O <sub>9</sub> | [M+H] <sup>+</sup> | Degraded amphibactin G                    | Annotation propagation | -                  | Cn52-H1+CNSA002     |
| 643.499_18.74 | -                                                             | -                  | -                                         | -                      | -                  | Cn52-H1+AC-K1-M-019 |

| <b><i>m/z</i>_RT</b> | <b>Formula (M)</b>                               | <b>Adduct</b>      | <b>Annotation/<br/>Compound<br/>class</b> | <b>Source</b> | <b>GNPS Analog</b> | <b>Samples</b>      |
|----------------------|--------------------------------------------------|--------------------|-------------------------------------------|---------------|--------------------|---------------------|
| 728.303_5.64         | -                                                | -                  | -                                         | -             | -                  | Cn52-H1+Cnat2-18.1  |
| 790.472_16.17        | C <sub>56</sub> H <sub>59</sub> N <sub>3</sub> O | [M+H] <sup>+</sup> | Benzenoids                                | CANOPUS       | -                  | Cn52-H1+AC-K1-M-019 |
| 792.486_16.54        | C <sub>56</sub> H <sub>61</sub> N <sub>3</sub> O | [M+H] <sup>+</sup> | -                                         | -             | -                  | Cn52-H1+AC-K1-M-019 |
| 794.502_17.01        | -                                                | -                  | -                                         | -             | -                  | Cn52-H1+AC-K1-M-019 |



**Table S3.** List of annotated metabolites detected in this study.

| Compound                                       | Adduct             | Theoretical m/z | Experimental m/z | ppm error | Formula (M)                                                                  | Source                 |
|------------------------------------------------|--------------------|-----------------|------------------|-----------|------------------------------------------------------------------------------|------------------------|
| Dimethyl azulene                               | [M+H] <sup>+</sup> | 157.101         | 157.101          | 0         | C <sub>12</sub> H <sub>12</sub>                                              | CANOPUS                |
| Dimethylvinyl azulene                          | [M+H] <sup>+</sup> | 183.117         | 183.116          | 5.5       | C <sub>14</sub> H <sub>14</sub>                                              | Annotation propagation |
| Methyl divinyl azulene                         | [M+H] <sup>+</sup> | 195.117         | 195.117          | 0         | C <sub>15</sub> H <sub>14</sub>                                              | Annotation propagation |
| Ethylmethyl azulenecarbaldehyde                | [M+H] <sup>+</sup> | 199.112         | 199.112          | 0         | C <sub>14</sub> H <sub>16</sub> O <sub>2</sub>                               | Annotation propagation |
| Dimethyl propenyl tetrahydroazulene            | [M+H] <sup>+</sup> | 201.164         | 201.164          | 0         | C <sub>15</sub> H <sub>20</sub>                                              | Annotation propagation |
| Bromotryptamine                                | [M+H] <sup>+</sup> | 239.018         | 239.018          | 0         | C <sub>10</sub> H <sub>8</sub> BrN                                           | GNPS                   |
| <i>N</i> -formyl bromotryptamine               | [M+H] <sup>+</sup> | 267.013         | 267.013          | 0         | C <sub>11</sub> H <sub>11</sub> BrN <sub>2</sub> O                           | Annotation propagation |
| <i>l</i> -acetyl bromotryptamine               | [M+H] <sup>+</sup> | 281.028         | 281.028          | 0         | C <sub>12</sub> H <sub>13</sub> BrN <sub>2</sub> O                           | Annotation propagation |
| HPTzTn-COOH                                    | [M+H] <sup>+</sup> | 307.021         | 307.021          | 0         | C <sub>13</sub> H <sub>10</sub> N <sub>2</sub> O <sub>3</sub> S <sub>2</sub> | GNPS                   |
| Cycloprodigiosin-CH <sub>2</sub>               | [M+H] <sup>+</sup> | 308.176         | 308.176          | 0         | C <sub>19</sub> H <sub>21</sub> N <sub>3</sub> O                             | Annotation propagation |
| Cycloprodigiosin-CH <sub>2</sub> +2H           | [M+H] <sup>+</sup> | 310.191         | 310.192          | 3.2       | C <sub>19</sub> H <sub>23</sub> N <sub>3</sub> O                             | Annotation propagation |
| Cycloprodigiosin                               | [M+H] <sup>+</sup> | 322.191         | 322.191          | 0         | C <sub>20</sub> H <sub>23</sub> N <sub>3</sub> O                             | GNPS                   |
| Prodigiosin                                    | [M+H] <sup>+</sup> | 324.207         | 324.207          | 0         | C <sub>18</sub> H <sub>27</sub> N <sub>3</sub> O                             | GNPS                   |
| Cycloprodigiosin+CH <sub>2</sub>               | [M+H] <sup>+</sup> | 336.207         | 336.207          | 0         | C <sub>21</sub> H <sub>25</sub> N <sub>3</sub> O                             | Annotation propagation |
| Methyl hexyl prodiginine                       | [M+H] <sup>+</sup> | 338.223         | 338.223          | 0         | C <sub>21</sub> H <sub>27</sub> N <sub>3</sub> O                             | Annotation propagation |
| Cycloprodigiosin+C <sub>2</sub> H <sub>4</sub> | [M+H] <sup>+</sup> | 350.223         | 350.223          | 0         | C <sub>22</sub> H <sub>27</sub> N <sub>3</sub> O                             | Annotation propagation |
| Heptylprodigiosin                              | [M+H] <sup>+</sup> | 352.238         | 352.239          | 2.8       | C <sub>22</sub> H <sub>29</sub> N <sub>3</sub> O                             | Annotation propagation |
| Moiramide B                                    | [M+H] <sup>+</sup> | 454.234         | 454.234          | 0         | C <sub>25</sub> H <sub>31</sub> N <sub>3</sub> O <sub>5</sub>                | GNPS                   |
| Andrimid                                       | [M+H] <sup>+</sup> | 480.249         | 480.250          | 1.5       | C <sub>27</sub> H <sub>33</sub> N <sub>3</sub> O <sub>5</sub>                | GNPS                   |
| Andrimid+2H                                    | [M+H] <sup>+</sup> | 482.265         | 482.265          | 0         | C <sub>27</sub> H <sub>35</sub> N <sub>3</sub> O <sub>5</sub>                | GNPS                   |
| Moiramide C                                    | [M+H] <sup>+</sup> | 496.244         | 496.245          | 2         | C <sub>27</sub> H <sub>33</sub> N <sub>3</sub> O <sub>6</sub>                | GNPS                   |
| Degraded amphibactin D                         | [M+H] <sup>+</sup> | 573.386         | 573.386          | 0         | C <sub>28</sub> H <sub>52</sub> N <sub>4</sub> O <sub>8</sub>                | Annotation propagation |
| Degraded amphibactin analog 1                  | [M+H] <sup>+</sup> | 575.365         | 575.365          | 0         | C <sub>27</sub> H <sub>50</sub> N <sub>4</sub> O <sub>9</sub>                | Annotation propagation |
| Dehydroxynocardamine                           | [M+H] <sup>+</sup> | 585.361         | 585.359          | 3.4       | C <sub>27</sub> H <sub>48</sub> N <sub>6</sub> O <sub>8</sub>                | GNPS                   |
| Desmethylenynocardamine                        | [M+H] <sup>+</sup> | 587.340         | 587.340          | 0         | C <sub>26</sub> H <sub>46</sub> N <sub>6</sub> O <sub>9</sub>                | GNPS                   |
| Degraded amphibactin analog 2                  | [M+H] <sup>+</sup> | 587.365         | 587.366          | 1.7       | C <sub>28</sub> H <sub>50</sub> N <sub>4</sub> O <sub>9</sub>                | Annotation propagation |
| Degraded amphibactin V                         | [M+H] <sup>+</sup> | 587.401         | 587.401          | 0         | C <sub>29</sub> H <sub>54</sub> N <sub>4</sub> O <sub>8</sub>                | Annotation propagation |
| Degraded amphibactin B                         | [M+H] <sup>+</sup> | 589.381         | 589.381          | 0         | C <sub>28</sub> H <sub>52</sub> N <sub>4</sub> O <sub>9</sub>                | Annotation propagation |
| Degraded amphibactin analog 3                  | [M+H] <sup>+</sup> | 597.386         | 597.386          | 0         | C <sub>30</sub> H <sub>53</sub> N <sub>4</sub> O <sub>8</sub>                | Annotation propagation |
| Degraded amphibactin E                         | [M+H] <sup>+</sup> | 599.401         | 599.402          | 1.7       | C <sub>30</sub> H <sub>54</sub> N <sub>4</sub> O <sub>8</sub>                | Annotation propagation |
| Desferrioxamine E                              | [M+H] <sup>+</sup> | 601.356         | 601.355          | 1.7       | C <sub>27</sub> H <sub>48</sub> N <sub>6</sub> O <sub>9</sub>                | GNPS                   |
| Degraded amphibactin H                         | [M+H] <sup>+</sup> | 601.417         | 601.417          | 0         | C <sub>30</sub> H <sub>56</sub> N <sub>4</sub> O <sub>8</sub>                | Annotation propagation |
| Degraded amphibactin analog 4                  | [M+H] <sup>+</sup> | 603.396         | 603.397          | 0         | C <sub>29</sub> H <sub>54</sub> N <sub>4</sub> O <sub>9</sub>                | Annotation propagation |
| Degraded amphibactin C                         | [M+H] <sup>+</sup> | 615.396         | 615.397          | 1.6       | C <sub>30</sub> H <sub>54</sub> N <sub>4</sub> O <sub>9</sub>                | Annotation propagation |
| Degraded amphibactin F                         | [M+H] <sup>+</sup> | 617.412         | 617.412          | 0         | C <sub>30</sub> H <sub>56</sub> N <sub>4</sub> O <sub>9</sub>                | NMR                    |
| Desferrioxamine G                              | [M+H] <sup>+</sup> | 619.366         | 619.366          | 0         | C <sub>27</sub> H <sub>50</sub> N <sub>6</sub> O <sub>10</sub>               | GNPS                   |

| Compound                      | Adduct                 | Theoretical m/z | Experimental m/z | ppm error | Formula (M)                                                     | Source                 |
|-------------------------------|------------------------|-----------------|------------------|-----------|-----------------------------------------------------------------|------------------------|
| Degraded amphibactin I        | [M+H] <sup>+</sup>     | 627.433         | 627.433          | 0         | C <sub>32</sub> H <sub>58</sub> N <sub>4</sub> O <sub>8</sub>   | Annotation propagation |
| Degraded amphibactin analog 5 | [M+H] <sup>+</sup>     | 629.412         | 629.412          | 0         | C <sub>31</sub> H <sub>56</sub> N <sub>4</sub> O <sub>9</sub>   | Annotation propagation |
| Degraded amphibactin analog 6 | [M+H] <sup>+</sup>     | 631.428         | 631.427          | 1.6       | C <sub>31</sub> H <sub>56</sub> N <sub>4</sub> O <sub>9</sub>   | Annotation propagation |
| Degraded amphibactin G        | [M+H] <sup>+</sup>     | 643.428         | 643.427          | 1.6       | C <sub>32</sub> H <sub>58</sub> N <sub>4</sub> O <sub>9</sub>   | Annotation propagation |
| Degraded amphibactin analog 7 | [M+H] <sup>+</sup>     | 645.443         | 645.443          | 0         | C <sub>32</sub> H <sub>60</sub> N <sub>4</sub> O <sub>9</sub>   | Annotation propagation |
| Amphibactin D                 | [M+H] <sup>+</sup>     | 832.503         | 832.501          | 1.9       | C <sub>38</sub> H <sub>69</sub> N <sub>7</sub> O <sub>13</sub>  | GNPS                   |
| Amphibactin analog 1          | [M+H] <sup>+</sup>     | 834.477         | 834.482          | 6.0       | C <sub>37</sub> H <sub>67</sub> N <sub>7</sub> O <sub>14</sub>  | Annotation propagation |
| Amphibactin B analog          | [M+H] <sup>+</sup>     | 846.482         | 846.481          | 1.2       | C <sub>37</sub> H <sub>67</sub> N <sub>11</sub> O <sub>10</sub> | GNPS                   |
| Amphibactin analog 2          | [M+H] <sup>+</sup>     | 846.482         | 846.481          | 1.2       | C <sub>37</sub> H <sub>67</sub> N <sub>11</sub> O <sub>10</sub> | Annotation propagation |
| Amphibactin V                 | [M+H] <sup>+</sup>     | 846.518         | 846.516          | 2.7       | C <sub>39</sub> H <sub>71</sub> N <sub>7</sub> O <sub>13</sub>  | Annotation propagation |
| Amphibactin B                 | [M+H] <sup>+</sup>     | 848.498         | 848.496          | 1.8       | C <sub>38</sub> H <sub>69</sub> N <sub>7</sub> O <sub>14</sub>  | GNPS                   |
| Amphibactin E                 | [M+H] <sup>+</sup>     | 858.518         | 858.517          | 1.5       | C <sub>40</sub> H <sub>71</sub> N <sub>7</sub> O <sub>13</sub>  | Annotation propagation |
| Amphibactin H                 | [M+H] <sup>+</sup>     | 860.534         | 860.531          | 3.4       | C <sub>40</sub> H <sub>73</sub> N <sub>7</sub> O <sub>13</sub>  | Annotation propagation |
| Amphibactin analog 4          | [M+H] <sup>+</sup>     | 862.513         | 862.512          | 1.4       | C <sub>39</sub> H <sub>71</sub> N <sub>7</sub> O <sub>14</sub>  | Annotation propagation |
| Bulbiferamide A               | [M+H] <sup>+</sup>     | 873.500         | 873.497          | 3.4       | C <sub>45</sub> H <sub>64</sub> N <sub>10</sub> O <sub>8</sub>  | GNPS                   |
| Amphibactin C                 | [M+H] <sup>+</sup>     | 874.513         | 874.513          | 0.2       | C <sub>40</sub> H <sub>71</sub> N <sub>7</sub> O <sub>14</sub>  | Annotation propagation |
| Amphibactin F                 | [M+H] <sup>+</sup>     | 876.529         | 876.527          | 2.1       | C <sub>40</sub> H <sub>73</sub> N <sub>7</sub> O <sub>14</sub>  | Annotation propagation |
| Fe-Amphibactin D              | [M+Fe-2H] <sup>+</sup> | 885.414         | 885.413          | 1.1       | C <sub>38</sub> H <sub>69</sub> N <sub>7</sub> O <sub>13</sub>  | Annotation propagation |
| Amphibactin I                 | [M+H] <sup>+</sup>     | 886.550         | 886.548          | 1.8       | C <sub>42</sub> H <sub>75</sub> N <sub>7</sub> O <sub>13</sub>  | Annotation propagation |
| Amphibactin analog 5          | [M+H] <sup>+</sup>     | 888.528         | 888.528          | 0.5       | C <sub>41</sub> H <sub>73</sub> N <sub>7</sub> O <sub>14</sub>  | Annotation propagation |
| Amphibactin analog 6          | [M+H] <sup>+</sup>     | 890.544         | 890.547          | 3.7       | C <sub>41</sub> H <sub>75</sub> N <sub>7</sub> O <sub>14</sub>  | Annotation propagation |
| Fe-Amphibactin analog 1       | [M+Fe-2H] <sup>+</sup> | 899.393         | 899.392          | 1.1       | C <sub>37</sub> H <sub>67</sub> N <sub>11</sub> O <sub>10</sub> | Annotation propagation |
| Fe-Amphibactin V              | [M+Fe-2H] <sup>+</sup> | 899.429         | 899.429          | 0         | C <sub>39</sub> H <sub>71</sub> N <sub>7</sub> O <sub>13</sub>  | Annotation propagation |
| Amphibactin G                 | [M+H] <sup>+</sup>     | 902.545         | 902.543          | 1.7       | C <sub>42</sub> H <sub>79</sub> N <sub>7</sub> O <sub>14</sub>  | GNPS                   |
| Amphibactin analog 7          | [M+H] <sup>+</sup>     | 904.560         | 904.563          | 3.4       | C <sub>42</sub> H <sub>77</sub> N <sub>7</sub> O <sub>14</sub>  | Annotation propagation |
| Fe-Amphibactin E              | [M+Fe-2H] <sup>+</sup> | 911.429         | 911.430          | 1.1       | C <sub>40</sub> H <sub>71</sub> N <sub>7</sub> O <sub>13</sub>  | Annotation propagation |
| Fe-Amphibactin H              | [M+Fe-2H] <sup>+</sup> | 913.445         | 913.445          | 0         | C <sub>40</sub> H <sub>73</sub> N <sub>7</sub> O <sub>13</sub>  | Annotation propagation |
| Fe-Amphibactin analog 4       | [M+Fe-2H] <sup>+</sup> | 915.424         | 915.424          | 0         | C <sub>39</sub> H <sub>71</sub> N <sub>7</sub> O <sub>14</sub>  | Annotation propagation |
| Fe-Amphibactin C              | [M+Fe-2H] <sup>+</sup> | 927.424         | 927.424          | 0         | C <sub>40</sub> H <sub>71</sub> N <sub>7</sub> O <sub>14</sub>  | Annotation propagation |
| Fe-Amphibactin F              | [M+Fe-2H] <sup>+</sup> | 929.440         | 929.439          | 1.1       | C <sub>40</sub> H <sub>73</sub> N <sub>7</sub> O <sub>14</sub>  | Annotation propagation |
| Fe-Amphibactin I              | [M+Fe-2H] <sup>+</sup> | 939.461         | 939.461          | 0         | C <sub>42</sub> H <sub>75</sub> N <sub>7</sub> O <sub>13</sub>  | Annotation propagation |
| Fe-Amphibactin analog 5       | [M+Fe-2H] <sup>+</sup> | 941.439         | 941.439          | 0         | C <sub>41</sub> H <sub>73</sub> N <sub>7</sub> O <sub>14</sub>  | Annotation propagation |
| Fe-Amphibactin analog 6       | [M+Fe-2H] <sup>+</sup> | 943.455         | 943.455          | 0         | C <sub>41</sub> H <sub>75</sub> N <sub>7</sub> O <sub>14</sub>  | Annotation propagation |
| Fe-Amphibactin G              | [M+Fe-2H] <sup>+</sup> | 955.456         | 955.454          | 2.1       | C <sub>42</sub> H <sub>79</sub> N <sub>7</sub> O <sub>14</sub>  | Annotation propagation |

**Table S4.**  $^1\text{H}$  (700 MHz) and  $^{13}\text{C}$  (176 MHz) NMR data of compound **1** in DMSO-  $d_6$  ( $J$  in Hz,  $\delta$  in ppm)

| Residue                                     | No.  | $\delta_{\text{C}}$ , type | $\delta_{\text{H}}$ (J, Hz), multiplicity |
|---------------------------------------------|------|----------------------------|-------------------------------------------|
| <i>N</i> -Ac- <i>N</i> -OH-Orn <sup>1</sup> | 1    | 173.8, C                   |                                           |
|                                             | 2    | 52.0, CH                   | 4.16, m                                   |
|                                             | 3    | 29.0, CH <sub>2</sub>      | 1.67 (m), 1.52 (m)                        |
|                                             | 4    | 23.3, CH <sub>2</sub>      | 1.51 (overlap)                            |
|                                             | 5    | 47.2, CH <sub>2</sub>      | 3.44, m                                   |
|                                             | 6    | 170.8, C                   |                                           |
|                                             | 7    | 20.8, CH <sub>3</sub>      | 1.96, s                                   |
|                                             |      | hydroxamate OH             | 9.69, s                                   |
|                                             |      | NH                         | 8.03, d (7.9)                             |
| <i>N</i> -Ac- <i>N</i> -OH-Orn <sup>2</sup> | 1    | 172.0, C                   |                                           |
|                                             | 2    | 52.5, CH                   | 4.31, m                                   |
|                                             | 3    | 29.9, CH <sub>2</sub>      | 1.60 (m), 1.46 (m)                        |
|                                             | 4    | 23.3, CH <sub>2</sub>      | 1.49, (overlap)                           |
|                                             | 5    | 46.9, CH <sub>2</sub>      | 3.44, m                                   |
|                                             | 6    | 170.7, C                   |                                           |
|                                             | 7    | 20.8, CH <sub>3</sub>      | 1.96, s                                   |
|                                             |      | hydroxamate OH             | 9.69, s                                   |
|                                             |      | NH                         | 7.96, d (8.2)                             |
| Lipid chain                                 | 1    | 171.4, C                   |                                           |
|                                             | 2    | 44.0, CH <sub>2</sub>      | 2.21, d (6.5)                             |
|                                             | 3    | 68.1, CH                   | 3.76, m                                   |
|                                             | 4    | 37.4, CH <sub>2</sub>      | 1.34, m                                   |
|                                             | 5-13 | 29.6-29.4                  | 1.31-1.20 (overlap)                       |
|                                             | 14   | 31.75, CH <sub>2</sub>     | 1.22 (overlap)                            |
|                                             | 15   | 29.16, CH <sub>2</sub>     | 1.22 (overlap)                            |
|                                             | 16   | 14.43, CH <sub>3</sub>     | 0.84, m                                   |
|                                             |      | OH                         | 4.63, d (4.8)                             |

**Table S5.** Biosynthetic gene clusters present in *Microbulbifer* sp. bacteria analyzed in this study.

| Strain                                              | Cluster | Category of predicted cluster | Most similar known cluster | Similarity | Genome size (Mb) |
|-----------------------------------------------------|---------|-------------------------------|----------------------------|------------|------------------|
| <i>Microbulbifer</i> sp.<br>CNSA002<br>Chromosome I | 1       | Arylpolyene                   | APE Vf                     | 40%        | 5.3              |
|                                                     | 2       | RiPP-like                     |                            |            |                  |
|                                                     | 3       | Ectoine                       | Ectoine                    | 100%       |                  |
|                                                     | 4       | NRPS siderophore              | Enantio-pyochelin          | 20%        |                  |
|                                                     | 5       | NRPS-like domain              |                            |            |                  |
|                                                     | 6       | NIS siderophore               |                            |            |                  |

**Table S6.** List of annotated *N*-acyl amides detected in this study.

| Annotation          | Adduct               | Theoretical <i>m/z</i> | Experimental <i>m/z</i> | ppm error | Source                 | Genus                                                                                                                 | Samples                                                                                                                      |
|---------------------|----------------------|------------------------|-------------------------|-----------|------------------------|-----------------------------------------------------------------------------------------------------------------------|------------------------------------------------------------------------------------------------------------------------------|
| Ala/Sarcosine-C10:0 | [M + H] <sup>+</sup> | 244.1907               | 244.191                 | 1.2       | GNPS                   | <i>Vibrio</i> , <i>Photobacterium</i> , <i>Bacillus</i> , coculture                                                   | Cn52-H1, Cn52-H1+VASA001, Ofav2-7                                                                                            |
| Ala/Sarcosine-C12:0 | [M + H] <sup>+</sup> | 272.0000               | 272.000                 | 0.0       | GNPS                   | <i>Pseudoalteromonas</i> , <i>Vibrio</i> , <i>Microbulbifer</i> , <i>Bacillus</i> , coculture                         | Cn52-H1, Cn52-H1+CNSA002, Cn52-H1+VASA001, Cnat2-18.1                                                                        |
| Ala/Sarcosine-C16:1 | [M + H] <sup>+</sup> | 326.2690               | 326.270                 | 3.1       | GNPS                   | <i>Pseudoalteromonas</i>                                                                                              | Cnat2-18.1                                                                                                                   |
| Amylamine-C18:0     | [M + H] <sup>+</sup> | 354.373                | 354.373                 | 0.0       | GNPS                   | <i>Pseudoalteromonas</i> , <i>Vibrio</i> , <i>Microbulbifer</i> , <i>Photobacterium</i> , <i>Bacillus</i> , coculture | AC-K1-M-019, Cn52-H1, Cn52-H1+AC-K1-M-019, Cn52-H1+CNSA002, Cn52-H1+VASA001, Cnat2-18.1, CNSA002, DL2H-2.2, Ofav2-7, VASA001 |
| Arg-C10:0           | [M + H] <sup>+</sup> | 329.2547               | 329.255                 | 0.9       | GNPS                   | <i>Vibrio</i> , <i>Photobacterium</i> , <i>Bacillus</i> , coculture                                                   | Cn52-H1, Cn52-H1+VASA001, Ofav2-7                                                                                            |
| Arg-C12:0           | [M + H] <sup>+</sup> | 357.2860               | 357.286                 | 0.0       | GNPS                   | <i>Vibrio</i> , <i>Photobacterium</i>                                                                                 | Cn52-H1, Ofav2-7                                                                                                             |
| Arg-C14:0           | [M + H] <sup>+</sup> | 385.3137               | 385.317                 | 8.6       | GNPS                   | <i>Pseudoalteromonas</i>                                                                                              | Cnat2-18.1                                                                                                                   |
| Arg-C15:0           | [M + H] <sup>+</sup> | 399.3330               | 399.334                 | 2.5       | Annotation propagation | <i>Pseudoalteromonas</i> , <i>Microbulbifer</i>                                                                       | Cnat2-18.1, CNSA002                                                                                                          |
| Arg-C15:1           | [M + H] <sup>+</sup> | 397.3173               | 397.318                 | 1.8       | Annotation propagation | <i>Pseudoalteromonas</i>                                                                                              | Cnat2-18.1                                                                                                                   |
| Arg-C16:0           | [M + H] <sup>+</sup> | 413.3486               | 413.349                 | 1.0       | GNPS                   | <i>Pseudoalteromonas</i>                                                                                              | Cnat2-18.1                                                                                                                   |
| Arg-C16:1           | [M + H] <sup>+</sup> | 411.3330               | 411.333                 | 0.0       | GNPS                   | <i>Pseudoalteromonas</i>                                                                                              | Cnat2-18.1                                                                                                                   |
| Arg-C17:1           | [M + H] <sup>+</sup> | 425.3486               | 425.348                 | 1.4       | GNPS                   | <i>Pseudoalteromonas</i>                                                                                              | Cnat2-18.1                                                                                                                   |
| Arg-C6:0            | [M + H] <sup>+</sup> | 273.1921               | 273.192                 | 0.4       | GNPS                   | <i>Vibrio</i>                                                                                                         | Cn52-H1                                                                                                                      |
| Arg-C8:0            | [M + H] <sup>+</sup> | 301.0000               | 301.000                 | 0.0       | GNPS                   | <i>Vibrio</i> , <i>Bacillus</i> , coculture                                                                           | Cn52-H1, Cn52-H1+VASA001                                                                                                     |
| Citrulline-C10:0    | [M + H] <sup>+</sup> | 330.2387               | 330.239                 | 0.9       | GNPS                   | <i>Photobacterium</i>                                                                                                 | Ofav2-7                                                                                                                      |
| Citrulline-C12:0    | [M + H] <sup>+</sup> | 358.2700               | 358.271                 | 2.8       | GNPS                   | <i>Photobacterium</i>                                                                                                 | Ofav2-7                                                                                                                      |
| Gly-C12:0           | [M + H] <sup>+</sup> | 258.2064               | 258.207                 | 2.3       | GNPS                   | <i>Photobacterium</i>                                                                                                 | Ofav2-7                                                                                                                      |
| Gly-C16:1           | [M + H] <sup>+</sup> | 312.2533               | 312.254                 | 2.2       | GNPS                   | <i>Pseudoalteromonas</i> , <i>Photobacterium</i>                                                                      | Cnat2-18.1, Ofav2-7                                                                                                          |
| His-C14:0           | [M + H] <sup>+</sup> | 366.2751               | 366.275                 | 0.3       | GNPS                   | <i>Pseudoalteromonas</i>                                                                                              | Cnat2-18.1                                                                                                                   |
| His-C16:1           | [M + H] <sup>+</sup> | 392.2908               | 392.291                 | 0.5       | GNPS                   | <i>Pseudoalteromonas</i>                                                                                              | Cnat2-18.1                                                                                                                   |
| Kynurenine-C2:0     | [M + H] <sup>+</sup> | 251.1026               | 251.102                 | 2.4       | GNPS                   | <i>Microbulbifer</i>                                                                                                  | CNSA002                                                                                                                      |
| Leu-C10:0           | [M + H] <sup>+</sup> | 286.2377               | 286.238                 | 1.0       | GNPS                   | <i>Vibrio</i> , <i>Photobacterium</i> , <i>Bacillus</i> , coculture                                                   | Cn52-H1, Cn52-H1+VASA001, Ofav2-7                                                                                            |

| Annotation   | Adduct               | Theoretical m/z | Experimental m/z | ppm error | Source                 | Genus                                                                                                                          | Samples                                                                             |
|--------------|----------------------|-----------------|------------------|-----------|------------------------|--------------------------------------------------------------------------------------------------------------------------------|-------------------------------------------------------------------------------------|
| Leu-C13:0    | [M + H] <sup>+</sup> | 328.2846        | 328.285          | 1.2       | Annotation propagation | <i>Pseudoalteromonas</i> ,<br><i>Bacillus</i>                                                                                  | Cnat2-18.1,<br>VASA001                                                              |
| Leu-C14:0    | [M + H] <sup>+</sup> | 342.3003        | 342.301          | 2.0       | GNPS                   | <i>Pseudoalteromonas</i>                                                                                                       | Cnat2-18.1,<br>DL2H-2.2                                                             |
| Leu-C14:1    | [M + H] <sup>+</sup> | 340.2846        | 340.286          | 4.1       | Annotation propagation | <i>Pseudoalteromonas</i>                                                                                                       | Cnat2-18.1                                                                          |
| Leu-C15:0    | [M + H] <sup>+</sup> | 356.3159        | 356.316          | 0.3       | GNPS                   | <i>Pseudoalteromonas</i> ,<br><i>Vibrio</i>                                                                                    | Cn52-H1, Cnat2-18.1                                                                 |
| Leu-C15:1    | [M + H] <sup>+</sup> | 354.3003        | 354.301          | 2.0       | GNPS                   | <i>Pseudoalteromonas</i> ,<br><i>Microbulbifer</i>                                                                             | Cnat2-18.1,<br>CNSA002                                                              |
| Leu-C17:0    | [M + H] <sup>+</sup> | 384.3472        | 384.348          | 2.1       | Annotation propagation | <i>Pseudoalteromonas</i> ,<br><i>Vibrio</i>                                                                                    | Cn52-H1, Cnat2-18.1                                                                 |
| Leu-C17:1    | [M + H] <sup>+</sup> | 382.3316        | 382.332          | 1.0       | GNPS                   | <i>Pseudoalteromonas</i> ,<br><i>Microbulbifer</i> ,<br>coculture                                                              | AC-K1-M-019,<br>Cn52-H1+AC-K1-M-019,<br>Cnat2-18.1,<br>CNSA002                      |
| Leu-C18:1    | [M + H] <sup>+</sup> | 396.3472        | 396.348          | 2.0       | GNPS                   | <i>Pseudoalteromonas</i> ,<br><i>Microbulbifer</i> ,<br><i>Bacillus</i> , coculture                                            | Cn52-H1+AC-K1-M-019, Cn52-H1+CNSA002,<br>Cn52-H1+VASA001,<br>Cnat2-18.1,<br>CNSA002 |
| Lys-C12:0    | [M + H] <sup>+</sup> | 329.2799        | 329.280          | 0.3       | GNPS                   | <i>Photobacterium</i>                                                                                                          | Ofav2-7                                                                             |
| Lys-C13:0-OH | [M + H] <sup>+</sup> | 359.2904        | 359.291          | 1.7       | GNPS                   | <i>Vibrio</i> , <i>Microbulbifer</i>                                                                                           | Cn52-H1,<br>CNSA002                                                                 |
| Lys-C14:0-OH | [M + H] <sup>+</sup> | 373.3061        | 373.306          | 0.3       | GNPS                   | <i>Microbulbifer</i>                                                                                                           | CNSA002                                                                             |
| Lys-C15:0    | [M + H] <sup>+</sup> | 371.3268        | 371.327          | 0.5       | GNPS                   | <i>Pseudoalteromonas</i> ,<br><i>Microbulbifer</i> ,<br><i>Photobacterium</i> ,<br><i>Bacillus</i>                             | Cnat2-18.1,<br>CNSA002,<br>Ofav2-7,<br>VASA001                                      |
| Lys-C15:0-OH | [M + H] <sup>+</sup> | 387.3217        | 387.322          | 0.8       | GNPS                   | <i>Pseudoalteromonas</i> ,<br><i>Vibrio</i> , <i>Microbulbifer</i>                                                             | Cn52-H1, Cnat2-18.1, CNSA002                                                        |
| Lys-C15:1    | [M + H] <sup>+</sup> | 369.3112        | 369.312          | 2.2       | GNPS                   | <i>Pseudoalteromonas</i> ,<br><i>Vibrio</i>                                                                                    | Cn52-H1, Cnat2-18.1                                                                 |
| Lys-C16:0    | [M + H] <sup>+</sup> | 385.3425        | 385.343          | 1.3       | GNPS                   | <i>Pseudoalteromonas</i> ,<br><i>Microbulbifer</i> ,<br><i>Bacillus</i>                                                        | Cnat2-18.1,<br>CNSA002,<br>VASA001                                                  |
| Lys-C16:1    | [M + H] <sup>+</sup> | 383.3268        | 383.327          | 0.5       | GNPS                   | <i>Pseudoalteromonas</i> ,<br><i>Vibrio</i> ,<br><i>Photobacterium</i> ,<br><i>Bacillus</i>                                    | Cn52-H1, Cnat2-18.1, Ofav2-7,<br>VASA001                                            |
| Lys-C17:1    | [M + H] <sup>+</sup> | 397.3425        | 397.343          | 1.3       | GNPS                   | <i>Pseudoalteromonas</i> ,<br><i>Vibrio</i> , <i>Bacillus</i>                                                                  | Cn52-H1, Cnat2-18.1, VASA001                                                        |
| Lys-C8:0     | [M + H] <sup>+</sup> | 273.2173        | 273.216          | 4.8       | GNPS                   | <i>Pseudoalteromonas</i> ,<br><i>Vibrio</i> , <i>Microbulbifer</i> ,<br><i>Photobacterium</i> ,<br><i>Bacillus</i> , coculture | Cn52-H1, Cn52-H1+CNSA002,<br>Cn52-H1+VASA001,<br>Cnat2-18.1,<br>Ofav2-7             |
| Met-C14:0    | [M + H] <sup>+</sup> | 360.2567        | 360.257          | 0.8       | Annotation propagation | <i>Pseudoalteromonas</i> ,<br><i>Microbulbifer</i>                                                                             | Cnat2-18.1,<br>CNSA002,<br>DL2H-2.2                                                 |
| Met-C15:1    | [M + H] <sup>+</sup> | 372.2567        | 372.258          | 3.5       | Annotation propagation | <i>Pseudoalteromonas</i> ,<br><i>Microbulbifer</i>                                                                             | Cnat2-18.1,<br>CNSA002                                                              |
| Met-C16:1    | [M + H] <sup>+</sup> | 386.2723        | 386.272          | 0.8       | GNPS                   | <i>Pseudoalteromonas</i> ,<br><i>Microbulbifer</i>                                                                             | Cnat2-18.1,<br>CNSA002                                                              |

| Annotation       | Adduct               | Theoretical m/z | Experimental m/z | ppm error | Source                 | Genus                                                                                                              | Samples                                                                                              |
|------------------|----------------------|-----------------|------------------|-----------|------------------------|--------------------------------------------------------------------------------------------------------------------|------------------------------------------------------------------------------------------------------|
| Met-C17:1        | [M + H] <sup>+</sup> | 400.288         | 400.289          | 2.5       | GNPS                   | <i>Pseudoalteromonas</i> ,<br><i>Microbulbifer</i> ,<br><i>Bacillus</i>                                            | Cnat2-18.1,<br>CNSA002,<br>VASA001                                                                   |
| Orn-C14:0-OH     | [M + H] <sup>+</sup> | 359.2904        | 359.291          | 1.7       | Annotation propagation | <i>Vibrio</i>                                                                                                      | Cn52-H1                                                                                              |
| Orn-C15:0-OH     | [M + H] <sup>+</sup> | 373.3061        | 373.306          | 0.3       | Annotation propagation | <i>Vibrio</i> , <i>Microbulbifer</i>                                                                               | Cn52-H1,<br>CNSA002                                                                                  |
| Orn-C16:0-OH     | [M + H] <sup>+</sup> | 387.3217        | 387.322          | 0.8       | Annotation propagation | <i>Pseudoalteromonas</i> ,<br><i>Vibrio</i> , <i>Microbulbifer</i>                                                 | Cn52-H1, Cnat2-18.1, CNSA002                                                                         |
| Orn-C16:1-OH     | [M + H] <sup>+</sup> | 385.3061        | 385.306          | 0.3       | Annotation propagation | <i>Vibrio</i>                                                                                                      | Cn52-H1                                                                                              |
| Orn-C17:1-OH     | [M + H] <sup>+</sup> | 399.3217        | 399.323          | 3.3       | Annotation propagation | <i>Pseudoalteromonas</i> ,<br><i>Microbulbifer</i>                                                                 | Cnat2-18.1,<br>CNSA002                                                                               |
| Orn-C18:1-OH     | [M + H] <sup>+</sup> | 413.3374        | 413.338          | 1.5       | Annotation propagation | <i>Pseudoalteromonas</i> ,<br><i>Vibrio</i> , <i>Microbulbifer</i>                                                 | Cn52-H1, Cnat2-18.1, CNSA002                                                                         |
| Phe-C10:0        | [M + H] <sup>+</sup> | 320.2220        | 320.222          | 0.0       | GNPS                   | <i>Vibrio</i> ,<br><i>Photobacterium</i> ,<br><i>Bacillus</i> , coculture                                          | Cn52-H1, Cn52-H1+VASA001,<br>Ofav2-7                                                                 |
| Phe-C12:0        | [M + H] <sup>+</sup> | 348.2533        | 348.254          | 2.0       | GNPS                   | <i>Pseudoalteromonas</i> ,<br><i>Vibrio</i> ,<br><i>Photobacterium</i>                                             | Cn52-H1, Cnat2-18.1, Ofav2-7                                                                         |
| Phe-C14:0        | [M + H] <sup>+</sup> | 376.2846        | 376.285          | 1.1       | GNPS                   | <i>Pseudoalteromonas</i> ,<br><i>Vibrio</i> , <i>Microbulbifer</i> ,<br>coculture                                  | Cn52-H1, Cn52-H1+CNSA002,<br>Cnat2-18.1,<br>CNSA002                                                  |
| Phe-C14:1        | [M + H] <sup>+</sup> | 374.2690        | 374.269          | 0.0       | GNPS                   | <i>Pseudoalteromonas</i>                                                                                           | Cnat2-18.1                                                                                           |
| Phe-C15:0        | [M + H] <sup>+</sup> | 390.3003        | 390.300          | 0.8       | GNPS                   | <i>Pseudoalteromonas</i> ,<br><i>Vibrio</i> , <i>Microbulbifer</i> ,<br><i>Photobacterium</i> ,<br><i>Bacillus</i> | Cn52-H1, Cnat2-18.1, CNSA002,<br>Ofav2-7,<br>VASA001                                                 |
| Phe-C15:1        | [M + H] <sup>+</sup> | 388.2846        | 388.287          | 6.2       | GNPS                   | <i>Pseudoalteromonas</i> ,<br><i>Microbulbifer</i>                                                                 | Cnat2-18.1,<br>CNSA002                                                                               |
| Phe-C16:0        | [M + H] <sup>+</sup> | 404.3159        | 404.316          | 0.2       | GNPS                   | <i>Pseudoalteromonas</i> ,<br><i>Microbulbifer</i> ,<br><i>Photobacterium</i> ,<br>coculture                       | Cn52-H1+CNSA002,<br>Cnat2-18.1,<br>CNSA002,<br>Ofav2-7                                               |
| Phe-C16:1        | [M + H] <sup>+</sup> | 402.3003        | 402.300          | 0.7       | GNPS                   | <i>Pseudoalteromonas</i> ,<br><i>Microbulbifer</i> ,<br><i>Photobacterium</i> ,<br><i>Bacillus</i> , coculture     | Cn52-H1+AC-K1-M-019, Cn52-H1+CNSA002,<br>Cnat2-18.1,<br>CNSA002,<br>DL2H-2.2,<br>Ofav2-7,<br>VASA001 |
| Phe-C17:1        | [M + H] <sup>+</sup> | 416.3159        | 416.317          | 2.6       | GNPS                   | <i>Pseudoalteromonas</i> ,<br><i>Microbulbifer</i> ,<br><i>Bacillus</i> , coculture                                | Cn52-H1+CNSA002,<br>Cnat2-18.1,<br>CNSA002,<br>VASA001                                               |
| Phe-C18:1        | [M + H] <sup>+</sup> | 430.3316        | 430.332          | 0.9       | GNPS                   | <i>Pseudoalteromonas</i>                                                                                           | Cnat2-18.1                                                                                           |
| Phe-C4:0         | [M + H] <sup>+</sup> | 236.1281        | 236.128          | 0.4       | GNPS                   | <i>Pseudoalteromonas</i> ,<br><i>Vibrio</i> ,<br><i>Photobacterium</i>                                             | Cn52-H1, Cnat2-18.1, Ofav2-7                                                                         |
| Thr/Hse-C11:0-OH | [M + H] <sup>+</sup> | 304.2118        | 304.211          | 2.6       | Annotation propagation | <i>Photobacterium</i>                                                                                              | Ofav2-7                                                                                              |
| Thr/Hse-C12:0-OH | [M + H] <sup>+</sup> | 318.2275        | 318.227          | 1.6       | GNPS                   | <i>Photobacterium</i>                                                                                              | Ofav2-7                                                                                              |

| Annotation       | Adduct               | Theoretical m/z | Experimental m/z | ppm error | Source                 | Genus                                                                                | Samples                                                                                       |
|------------------|----------------------|-----------------|------------------|-----------|------------------------|--------------------------------------------------------------------------------------|-----------------------------------------------------------------------------------------------|
| Thr/Hse-C13:0    | [M + H] <sup>+</sup> | 314.2326        | 314.232          | 1.9       | Annotation propagation | <i>Photobacterium</i>                                                                | Ofav2-7                                                                                       |
| Thr/Hse-C13:0-OH | [M + H] <sup>+</sup> | 332.2431        | 332.243          | 0.3       | Annotation propagation | <i>Photobacterium</i>                                                                | Ofav2-7                                                                                       |
| Thr/Hse-C14:0-OH | [M + H] <sup>+</sup> | 346.2588        | 346.260          | 3.5       | GNPS                   | <i>Photobacterium</i>                                                                | Ofav2-7                                                                                       |
| Thr/Hse-C14:1-OH | [M + H] <sup>+</sup> | 344.2431        | 344.244          | 2.6       | Annotation propagation | <i>Pseudoalteromonas, Photobacterium, coculture</i>                                  | AC-K1-M-019, Cn52-H1+AC-K1-M-019, Ofav2-7                                                     |
| Thr/Hse-C16:1    | [M + H] <sup>+</sup> | 356.2795        | 356.280          | 1.4       | GNPS                   | <i>Vibrio</i>                                                                        | Cn52-H1                                                                                       |
| Trp-C14:0        | [M + H] <sup>+</sup> | 415.2955        | 415.295          | 1.2       | GNPS                   | <i>Pseudoalteromonas</i>                                                             | Cnat2-18.1                                                                                    |
| Trp-C15:1        | [M + H] <sup>+</sup> | 427.2955        | 427.296          | 1.2       | GNPS                   | <i>Pseudoalteromonas</i>                                                             | Cnat2-18.1                                                                                    |
| Trp-C16:1        | [M + H] <sup>+</sup> | 441.3112        | 441.311          | 0.5       | GNPS                   | <i>Pseudoalteromonas</i>                                                             | Cnat2-18.1                                                                                    |
| Trp-C8:0         | [M + H] <sup>+</sup> | 331.2016        | 331.202          | 1.2       | GNPS                   | <i>Vibrio, Photobacterium</i>                                                        | Cn52-H1, Ofav2-7                                                                              |
| Tryptamine-C10:0 | [M + H] <sup>+</sup> | 315.2431        | 315.244          | 2.9       | Annotation propagation | <i>Vibrio, Microbulbifer, coculture</i>                                              | Cn52-H1, Cn52-H1+CNSA002                                                                      |
| Tryptamine-C11:0 | [M + H] <sup>+</sup> | 329.2587        | 329.259          | 0.9       | Annotation propagation | <i>Vibrio, Microbulbifer, Bacillus, coculture</i>                                    | Cn52-H1, Cn52-H1+CNSA002, Cn52-H1+VASA001                                                     |
| Tryptamine-C12:0 | [M + H] <sup>+</sup> | 343.2744        | 343.275          | 1.7       | GNPS                   | <i>Vibrio, Microbulbifer, Bacillus, coculture</i>                                    | Cn52-H1, Cn52-H1+CNSA002, Cn52-H1+VASA001                                                     |
| Tryptamine-C14:0 | [M + H] <sup>+</sup> | 371.3057        | 371.306          | 0.8       | GNPS                   | <i>Vibrio, Bacillus, coculture</i>                                                   | Cn52-H1, Cn52-H1+VASA001                                                                      |
| Tryptamine-C15:0 | [M + H] <sup>+</sup> | 385.3213        | 385.323          | 4.4       | GNPS                   | <i>Vibrio, Bacillus, coculture</i>                                                   | Cn52-H1, Cn52-H1+VASA001                                                                      |
| Tryptamine-C16:1 | [M + H] <sup>+</sup> | 397.3213        | 397.322          | 1.8       | GNPS                   | <i>Pseudoalteromonas, Vibrio, Microbulbifer, Photobacterium, Bacillus, coculture</i> | Cn52-H1, Cn52-H1+AC-K1-M-019, Cn52-H1+CNSA002, Cn52-H1+VASA001, Cnat2-18.1, DL2H-2.2, Ofav2-7 |
| Tryptamine-C18:1 | [M + H] <sup>+</sup> | 425.3526        | 425.353          | 0.9       | GNPS                   | <i>Vibrio, Microbulbifer, Photobacterium, Bacillus, coculture</i>                    | Cn52-H1, Cn52-H1+CNSA002, Cn52-H1+VASA001, Ofav2-7                                            |
| Tryptamine-C2:0  | [M + H] <sup>+</sup> | 203.1179        | 203.118          | 0.5       | GNPS                   | <i>Pseudoalteromonas, Vibrio, Photobacterium, Bacillus, coculture</i>                | Cn52-H1, Cn52-H1+AC-K1-M-019, Cn52-H1+VASA001, Ofav2-7                                        |
| Tryptamine-C5:0  | [M + H] <sup>+</sup> | 245.1648        | 245.165          | 0.8       | Annotation propagation | <i>Pseudoalteromonas, Vibrio, Microbulbifer, Photobacterium, Bacillus, coculture</i> | Cn52-H1+AC-K1-M-019, Cn52-H1, Cn52-H1+CNSA002, Cn52-H1+VASA001, Ofav2-7                       |



| Annotation      | Adduct               | Theoretical<br><i>m/z</i> | Experimental<br><i>m/z</i> | ppm<br>error | Source                 | Genus                                                                        | Samples                                                |
|-----------------|----------------------|---------------------------|----------------------------|--------------|------------------------|------------------------------------------------------------------------------|--------------------------------------------------------|
| Tryptamine-C6:1 | [M + H] <sup>+</sup> | 257.1648                  | 257.165                    | 0.8          | Annotation propagation | <i>Photobacterium</i>                                                        | Ofav2-7                                                |
| Tyr-C10:0       | [M + H] <sup>+</sup> | 336.2169                  | 336.217                    | 0.3          | GNPS                   | <i>Vibrio</i> ,<br><i>Photobacterium</i>                                     | Cn52-H1, Ofav2-7                                       |
| Tyr-C12:1       | [M + H] <sup>+</sup> | 362.2326                  | 362.233                    | 1.1          | GNPS                   | <i>Pseudoalteromonas</i> ,<br><i>Vibrio</i> , <i>Bacillus</i> ,<br>coculture | Cn52-H1, Cn52-H1+AC-K1-M-019, Cn52-H1+VASA001, VASA001 |
| Tyr-C14:0       | [M + H] <sup>+</sup> | 392.2795                  | 392.282                    | 6.4          | GNPS                   | <i>Pseudoalteromonas</i>                                                     | Cnat2-18.1                                             |
| Tyr-C15:1       | [M + H] <sup>+</sup> | 404.2795                  | 404.282                    | 6.2          | GNPS                   | <i>Pseudoalteromonas</i> ,<br>coculture                                      | AC-K1-M-019, Cn52-H1+AC-K1-M-019, Cnat2-18.1           |
| Tyr-C16:1       | [M + H] <sup>+</sup> | 418.2952                  | 418.296                    | 1.9          | GNPS                   | <i>Pseudoalteromonas</i>                                                     | AC-K1-M-019                                            |
| Tyr-C17:1       | [M + H] <sup>+</sup> | 432.3108                  | 432.311                    | 0.5          | GNPS                   | <i>Pseudoalteromonas</i>                                                     | AC-K1-M-019                                            |
| Tyr-C8:0        | [M + H] <sup>+</sup> | 308.1856                  | 308.185                    | 1.9          | GNPS                   | <i>Photobacterium</i>                                                        | Ofav2-7                                                |
